1 **Cellular and Transcriptional Signature of the Nasal Mucosa is Associated with Susceptibility to**  
2 **Pneumococcal Carriage in Older Adults**

3  
4 Britta C. Urban<sup>1,2,3\*</sup>, André N. A. Gonçalves<sup>1,2,3\*</sup>, Dessi Loukov<sup>2</sup>, Fernando M. Passos<sup>2</sup>, Jesús Reiné<sup>1,2,3</sup>,  
5 Patrícia Gonzalez-Dias<sup>1,2,3</sup>, Carla Solórzano-Gonzalez<sup>1,2,3</sup>, Elena Mitsi<sup>1,2,3</sup>, Elissavet Nikolaou<sup>2,4,5</sup>, Daniel  
6 O'Connor<sup>1,3</sup>, Andrea M. Collins<sup>2</sup>, Hugh Adler<sup>2</sup>, Jamie Rylance<sup>2</sup>, Stephen B. Gordon<sup>2,6</sup>, Simon P. Jochems<sup>7</sup>,  
7 Helder I. Nakaya<sup>8,9</sup>, Daniela M. Ferreira<sup>1,2,3</sup>

8  
9 **Affiliations:**

10 <sup>1</sup> Oxford Vaccine Group, University of Oxford, Oxford, United Kingdom.

11 <sup>2</sup> Clinical Sciences, Liverpool School of Tropical Medicine, Liverpool, United Kingdom.

12 <sup>3</sup> NIHR Oxford Biomedical Research Centre, Oxford, UK

13 <sup>4</sup>Infection, Immunity and Global Health, Murdoch Children's Research Institute, Parkville, Victoria,  
14 Australia

15 <sup>5</sup>Department of Microbiology and Immunology at the Peter Doherty Institute for Infection and  
16 Immunity, The University of Melbourne, Parkville, Victoria, Australia

17 <sup>6</sup>Malawi-Liverpool-Wellcome Clinical Research Programme, Blantyre, Malawi

18 <sup>7</sup>Department of Parasitology, Leiden University Centre for Infectious Diseases, Leiden University  
19 Medical Centre, Leiden, the Netherlands.

20 <sup>8</sup>Hospital Israelita Albert Einstein, São Paulo, Brazil.

21 <sup>9</sup>Department of Clinical and Toxicological Analyses, School of Pharmaceutical Sciences, University of  
22 São Paulo, São Paulo, Brazil

23  
24 \* These authors contributed equally

25  
26 **Corresponding authors:**

27 Britta Urban, [Britta.urban@paediatrics.ox.ac.uk](mailto:Britta.urban@paediatrics.ox.ac.uk)

28 Daniela Ferreira, [Daniela.ferreira@paediatrics.ox.ac.uk](mailto:Daniela.ferreira@paediatrics.ox.ac.uk)

29  
30 **Word Count:** 4172

31 **NOTE:** This preprint reports new research that has not been certified by peer review and should not be used to guide clinical practice.

32 **Contributions:**

33 **Obtained funding:** SBG, DMF

34 **Study design:** HA, DMF, JRy

35 **Obtained ethical approval:** HA, JRy

36 **Data collection:** HA, AC, JR, SJ, CS, EM, EN

37 **Data analyses:** DL, FMP, BU, ANAG, PGD

38 **Manuscript preparation:** BU, ANAG, DO, DMF, HN, SJ

39

40 All authors contributed to the manuscript and approved the final version submitted for publication.

41

42

## 43 **Abstract**

44 *Streptococcus pneumoniae* colonization in the upper respiratory tract is linked to pneumococcal  
45 disease development, predominantly affecting the very young and older adults. As the global  
46 population ages and comorbidities increase, there is a heightened concern about this infection. We  
47 investigated the immunological responses of older adults to pneumococcal controlled human  
48 infection by analysing the cellular composition and gene expression in the nasal mucosa. Our  
49 comparative analysis with younger adults revealed distinct gene expression patterns in older  
50 individuals susceptible to colonization, highlighted by neutrophil activation and elevated levels of  
51 CXCL9 and CXCL10. Unlike younger adults challenged with pneumococcus, older adults did not show  
52 recruitment of monocytes into the nasal mucosa following nasal colonization. These findings suggest  
53 age-associated cellular changes, in particular enhanced mucosal inflammation, that may predispose  
54 older adults to pneumococcal colonization. If similar changes are observed in the lung of susceptible  
55 older adults, these may explain the increased risk of pneumococcal disease in vulnerable populations.

56

## 57 **Introduction**

58 *Streptococcus pneumoniae* is the primary cause of bacterial pneumonia and can reside in the upper  
59 respiratory tract without causing symptoms. Colonization with pneumococcus is a prerequisite of  
60 pneumococcal disease, with higher colonization levels increasing the risk of bacteria entering the  
61 lung<sup>1</sup>. Invasive pneumococcal disease and community-acquired pneumonia are a leading cause of  
62 death worldwide. Community-acquired pneumonia affects young children (below five years) and older  
63 adults disproportionately<sup>2-6</sup>. With an aging population and rising prevalence of comorbidities such as  
64 COPD, obesity, diabetes, and asthma, the incidence of pneumonia is predicted to grow.

65 Our pneumococcal controlled human infection model is an ideal model to investigate molecular and  
66 cellular mechanisms that contribute to protection or susceptibility to colonization by pneumococci<sup>7</sup>.  
67 Using this model in young adults, we have shown that both innate and adaptive immune responses at  
68 the mucosa were associated with protection from colonization. We have also shown that colonization  
69 is typically established within a day after nasal exposure, ultimately prompting a local immune  
70 response that clears the pneumococci<sup>8</sup>. This response included the activation of neutrophils and a  
71 likely CCL2-mediated influx of monocytes, resulting in bacterial clearance through processes like  
72 phagocytosis and the release of reactive oxygen species<sup>9</sup>. Younger individuals resistant to colonization  
73 have more mucosal-associated invariant T cells (MAIT) in their nasal mucosa and in the peripheral  
74 circulation exhibit elevated TNF $\alpha$  and IFN $\gamma$  levels when exposed to Spn6B<sup>10</sup>. In addition, young study  
75 participants protected from colonization showed a higher frequency of pre-existent peripheral blood  
76 memory B cells specific to the polysaccharide of the inoculated strain<sup>11</sup>. Moreover, colonization itself

77 is an immunising event that results in increased antigen-specific B cells in circulation and higher levels  
78 of serum antibodies<sup>10,11</sup>. Although the impact of the SARS-CoV-2 pandemic increased the number of  
79 studies investigating mucosal immune, they remain rare in older adults. As a consequence, whether  
80 similar mechanisms are involved in protection and susceptibility of older adults from pneumococcus  
81 infection is not known.

82 Older adults face a higher risk of severe pneumococcal disease than younger adults. While other  
83 factors such as co-morbidities, increased lung microaspiration and viral co-infections may contribute  
84 to this increased risk<sup>12</sup>, altered immune responses due to aging also play an important role<sup>13-15</sup>. In our  
85 study, when we exposed healthy older adults (over 50 years) to pneumococcus, their colonization  
86 rates and densities mirrored that of younger adults<sup>16</sup>. However, their immune response differed –  
87 those who became colonized did not exhibit the expected boost in specific IgG against the inoculated  
88 strain capsular polysaccharide (CPS), as seen in younger adults<sup>16</sup>. In addition, in those participants who  
89 were challenged and did not become colonized, IgG levels to the CPS decreased a month after  
90 challenge. Re-challenging them with homologous pneumococcus 6B up to a year later did not protect  
91 older adults from colonization, unlike in younger adults where re-challenge conferred protection<sup>7,16</sup>.  
92 Together, these findings suggest a diminished immunizing effect of colonization in older adults,  
93 potentially increasing their vulnerability to severe pneumococcal disease even with lower colonization  
94 rates<sup>17</sup>.

95 To gain a better understanding of mechanisms underlying the lack of protection, we investigated here  
96 the changes in cellular composition, inflammatory status and gene expression patterns of nasal cells  
97 from older adults before and during experimental human pneumococcal colonization. We then  
98 compared these changes with those from younger adults<sup>9,18</sup>. Older but not younger adults susceptible  
99 to colonization displayed a distinct pattern of activated gene pathways associated with neutrophil  
100 degranulation and increased concentrations of CXCL9 and CXCL10 in the nasal mucosa at baseline. Our  
101 results open the possibility of predicting susceptibility to pneumococcal colonization and greater risk  
102 of pneumococcal disease in older adults which would facilitate better prevention and treatment.

103

## 104 **Results**

### 105 ***Distinct gene expression patterns in the nasal mucosa of older adults linked to carriage susceptibility***

106 We previously conducted an experimental human pneumococcal challenge trial in healthy, older  
107 adults<sup>16</sup> during which we collected nasal lining fluid and nasal microbiopsies to determine soluble  
108 immune mediators, nasal cell phenotype and transcriptome from a subset of study participants. An  
109 overview of the sample schedule relative to inoculation with serotype 6B (Spn6B) for older adults is

110 provided in Supplementary Fig. 1. No demographic differences were seen between study participants  
111 susceptible (n=17) or protected (n=24) from colonization (Supplementary Table 1).

112 We first investigated which immune response pathways were enriched in protected and susceptible  
113 older adults before (day -5) and after (day 2 and day 9) pneumococcal challenge using gene set  
114 variation analysis (GSVA) (Fig. 1a, Supplementary Table 2). Based on Euclidean distance clustering,  
115 gene sets fell into three groups with different enrichment patterns over time and carriage status.  
116 Group I gene sets were associated with innate immune responses and cytokine signalling including  
117 pathways associated with “Antimicrobial peptides”, “Neutrophil degranulation”, “DAP12 interactions”  
118 and “Toll-like receptor cascades”. They remained higher across all time points in susceptible older  
119 adults but were not induced in protected older adults. By contrast, group II gene sets were largely  
120 associated with antibody-mediated processes such as “Complement Cascade” and “Fc gamma  
121 receptor dependent phagocytosis”. These pathways were predominantly enriched at baseline (day -  
122 5) in protected older adults and induced in susceptible older adults by day 9. Group III gene sets  
123 associated with antigen presentation and T cell activation and were induced in susceptible study  
124 participants on day 9.

125 We then asked whether similar gene pathway patterns were evident in younger adults before  
126 pneumococcal challenge using a control group from our previously published studies (protected n=6,  
127 susceptible n=8, age < 50 years)<sup>9,18</sup>. In younger adults, GSVA of the nasal cell transcriptome showed  
128 no difference in the regulation of group I gene or group II gene sets at baseline, between protected  
129 and susceptible study participants. However, gene pathways in both groups were rapidly induced after  
130 pneumococcal challenge in susceptible younger adults indicating activation of innate and antibody-  
131 mediated immune responses (Fig 1b, Supplementary Table 3). By contrast, activation of gene sets in  
132 group III associated with “TCR signalling”, “Costimulation by the CD28 family” and MHC class I and  
133 class II antigen processing were enriched in susceptible younger adults at baseline. In summary, gene  
134 expression patterns in the nasal mucosa were fundamentally different between susceptible younger  
135 and older adults, with susceptible older adults exhibiting a unique gene set signature associated with  
136 an activated innate immune response profile before pneumococcal challenge.

137

### 138 **Co-expression analysis of genes reveals upregulation of neutrophil degranulation pathways in the** 139 **nasal mucosa of susceptible older adults**

140 Co-expression analysis allows identification of genes which are co-regulated during cellular processes  
141 or different functional states and which are shared within a sample group. We therefore investigated  
142 which genes were co-expressed in susceptible and protected older adults using CEMiTool<sup>19</sup> across all  
143 three timepoints. Co-expression analysis identified three modules (M1-M3, Fig. 2a) with module M1

144 genes co-expressed in protected and M2 genes co-expressed in susceptible older adults at baseline.  
145 Notably, genes within the M2 module were enriched for the Reactome pathways “Neutrophil  
146 Degranulation”, “Immunoregulatory interactions between a Lymphoid and a Non-lymphoid Cell” and  
147 “Signalling by Interleukins” (Supplementary Fig. 2) which were also among upregulated gene sets in  
148 susceptible older adults identified by GSVA.

149 We then identified genes in the M2 module linked to carriage susceptibility by examining which ones  
150 were differentially expressed between susceptible and protected older adults. Module M2 identified  
151 270 co-expressed genes (Supplementary Fig. 2) of which 216 were differentially expressed at at least  
152 one timepoint (Supplementary Table 4). Network analysis of genes overexpressed in susceptible study  
153 participants before challenge (Fig. 2b) revealed a more granular picture of interlinked immune  
154 response pathways. Genes overexpressed within the neutrophil degranulation pathway at baseline in  
155 susceptible study participants included *SIGLEC14* (2.42-fold,  $p=0.037$ ), encoding a sialic acid binding  
156 protein and *PLAUR* (2.13-fold,  $p=0.012$ ), encoding the Plasminogen Activator Urokinase receptor.  
157 Notably, the expression of PLAUR is upregulated by immune activation and the soluble form has been  
158 proposed as a marker for chronic inflammation<sup>20</sup>. Both, *SIGLEC14* and *TREM1* (4-fold,  $p=0.0028$ ) which  
159 is induced two days after challenge signal through the DAP12 (*TYROBP*, 2.3-fold,  $p=0.027$ ) complex  
160 resulting in enhanced survival of immune cells and increased production of pro-inflammatory  
161 cytokines<sup>21,22</sup>. In a mouse model of pneumococcal pneumonia, TREM1 is critical for migration of  
162 neutrophils to the lung and enhanced early response of alveolar macrophages<sup>23</sup>. Of the Fc receptors,  
163 *FCAR* encoding the Fc $\alpha$ R was 3.13-fold overexpressed at baseline ( $p=0.0078$ ) whereas genes encoding  
164 Fc $\gamma$  receptors were induced on days 2 and 9 after pneumococcal challenge (Fig. 2c). Of the M2 cytokine  
165 and chemokine genes, *IL1B* (2.6-fold,  $p=0.016$ ) and *CXCL8* (3.4-fold,  $p=0.0031$ ) showed higher  
166 expression in nasal cells of susceptible compared with protected older adults at baseline.

167

#### 168 ***Increased baseline expression of CXCL9 and CXCL10 in the nasal mucosa of susceptible older adults***

169 Given the increased expression of genes associated with innate immune and cytokine responses in  
170 susceptible older adults, we asked whether transcriptional changes are at least in part reflected at the  
171 protein level in the nasal mucosa (Fig. 3 and Supplementary Fig. 3). The median concentration of the  
172 chemokine CXCL10 (IP10) was 2.27-fold higher before (day -5) and 3.4-fold higher on day 2 in nasal  
173 lining fluid after challenge in susceptible compared with protected study participants. Likewise, the  
174 concentration of the related chemokine CXCL9 was 1.16-fold increased at baseline (day -5) in  
175 susceptible older adults (Fig. 3a). Expression of the genes encoding these two chemokines were also  
176 increased in susceptible compared with protected older adults at baseline only (Fig. 3b, *CXCL9* 2.1-  
177 fold,  $p=0.021$ ); *CXCL10* 2.6-fold,  $p=0.003$ ). These data are reminiscent of younger adults with an

178 asymptomatic viral infection or receiving Live Attenuated Influenza Vaccine (LAIV), who showed high  
179 baseline levels of CXCL10 and increased susceptibility to pneumococcal colonization upon challenge<sup>9</sup>.  
180 As with younger adults, there were no differences between CCL2 concentrations between susceptible  
181 and protected older adults. Unlike in younger adults, we did not observe an association between CCL2  
182 concentration and the frequency of monocytes in the nasal mucosa (Supplementary Fig. 4). However,  
183 *CCL2* gene expression was 4 times higher in susceptible compared to protected older adults at day 9  
184 after challenge suggesting that monocyte recruitment might be delayed. In addition, the  
185 concentration of IL-15, a cytokine which regulates T cell proliferation and activation, gradually  
186 increased in protected study participants after challenge and was 1.3-fold higher at day 9 compared  
187 to susceptible study participants. There were no statistically significant differences between protected  
188 and susceptible study participants before and after pneumococcal challenge for all other cytokines  
189 analysed (Supplementary Fig. 3a).

190 When considering induction of cytokines within each group of susceptible or protected study  
191 participants (log<sub>2</sub> fold change for day 2, 7 and 9 against baseline), we observed responses to  
192 pneumococcal challenge in the nasal mucosa of protected but not susceptible study participants (Fig.  
193 3c and Supplementary Table S5). EGF significantly increased from baseline in protected study  
194 participants on days 2 and 9 and VEGF and G-CSF increased on day 2. In protected study participants,  
195 the concentration of the monocyte chemoattractant MIP1 $\alpha$  and MIP1 $\beta$ , as well as CXCL9 and IL12  
196 increased from baseline to day 2. The pro-inflammatory cytokines IL1 $\beta$  and IL6 were also induced. This  
197 is in contrast to observations in protected younger adults<sup>8,9</sup> who showed rapid induction of nasal  
198 cytokines which peaked within 24 hours after challenge but were undetectable by 48h (day 2)  
199 indicating that protected older adults may show a slight delay in nasal cytokine responses to  
200 pneumococcal challenge. Cytokine levels at baseline did not correlate with age in study participants  
201 (Supplementary Fig. 3b).

202

### 203 **Lack of monocyte recruitment in susceptible older adults after pneumococcal challenge**

204 The nasal cell gene expression profiles suggested that older adults susceptible to pneumococcal  
205 colonization had higher levels of innate immune cell activation compared to protected older adults.  
206 Granulocytes are abundant in the nasal mucosa while monocytes are sparse with the later rapidly  
207 recruited after challenge in younger adults<sup>9,24</sup>.

208 We analysed the cellular composition of nasal cells by flow cytometry from nasal microbiopsies which  
209 were obtained in parallel to those used for transcriptome analysis. The overall number of leukocytes,  
210 granulocytes and monocytes as a ratio to epithelial cells<sup>9,25</sup> were comparable between younger and  
211 older adults before pneumococcal challenge (Fig. 4a). After challenge, there were no differences in

212 the proportion of leukocytes or granulocytes over the following 29 days between susceptible and  
213 protected study participants in either younger or older adults (Fig. 4b, c). In contrast to younger  
214 adults<sup>9</sup>, monocytes were not recruited into the nasal mucosa of susceptible older adults in response  
215 to pneumococcal challenge (Fig. 4d). These results are in line with the limited and variable induction  
216 of CCL2 (MCP1) in susceptible older adults (Fig. 3a).

217 To gain a better understanding of granulocyte and monocyte subsets beyond the limited number of  
218 surface markers used during flow cytometry, we applied deconvolution analysis of mixed cell  
219 populations obtained in our bulk transcriptome data. Based on this analysis, mature neutrophils were  
220 the most abundant granulocyte population in the nasal mucosa independent of carriage status and  
221 timepoint (Fig. 4e, Supplementary Table S6). Myeloid cells were more heterogenous with CD141+  
222 cDC1 the most abundant population in both susceptible and protected study participants.  
223 Intermediate monocytes appeared more abundant in susceptible participants at baseline.  
224 Intermediate monocytes display an activated phenotype and are generally associated with more  
225 inflammatory conditions. Notably, they were enriched in the nasal mucosa of older adults but not  
226 younger adults infected with Influenza A virus and correlated with age<sup>24</sup>.

227

#### 228 **Activation of neutrophils is associated with susceptibility to carriage in older adults**

229 Since susceptible older adults showed enrichment of gene pathways associated with neutrophil  
230 degranulation before challenge (Fig 1 and Fig. 2), we investigated the activation of granulocytes and  
231 monocytes before (day -5) and after (days 2, 7, 9, 29) pneumococcal challenge. The expression level  
232 of CD16 - but not CD66b or HLA DR - was consistently lower on granulocytes of older adults susceptible  
233 to pneumococcal colonization with significant lower levels observed at baseline and day 7 after  
234 challenge (Fig. 5a). Although FcγRIIIB can be stored in intracellular vesicle before rapid deployment  
235 onto the cell membrane in response to activation<sup>26,27</sup>, higher expression of CD16 on granulocytes  
236 positively correlated with gene expression levels for *FCGR3B* in protected but not susceptible older  
237 adults at baseline (Fig. 5b). CD16 is rapidly cleaved from the surface following activation of  
238 granulocytes indicating that these cells may have been already activated before challenge in older  
239 adults susceptible to pneumococcal carriage.

240 Opsonisation, degranulation and radical oxygen species production are important defence  
241 mechanisms against colonization with pneumococcus<sup>28</sup>. To determine whether neutrophil  
242 degranulation increased after challenge with pneumococcus as we reported for younger adults<sup>9</sup>, we  
243 measured the concentration of myeloperoxidase (MPO), a soluble marker for degranulation of  
244 azurophil neutrophil granules, in nasal lining fluids. Before challenge, the concentration of MPO in the  
245 nasal lining fluid was 2-fold higher in older adults compared to younger adults (Fig. 5c). Unlike carriage-



246 positive younger adults, levels of MPO in the nasal lining fluid did not increase after challenge in  
247 susceptible older adults (Fig 5d).

248 Next, we asked whether expression levels of 66 genes associated with the neutrophil degranulation  
249 pathway within the M2 module correlated with the MPO concentration in nasal lining fluid (Fig. 5e).  
250 MPO levels positively correlated with expression levels of neutrophil degranulation M2 module genes  
251 in susceptible older adults before but not after challenge suggesting that granulocytes were refractory  
252 to further activation. By contrast, in older adults protected from carriage, neutrophil degranulation  
253 genes within the M2 module correlated with MPO levels after but not before challenge implying that  
254 granulocytes became activated and contributed to clearance of pneumococci from the nose as we  
255 reported previously<sup>8</sup>. Together these data indicate that neutrophils in susceptible older adults are in  
256 a state of activation before challenge with limited responses to pneumococci after challenge.

257

### 258 **Activation of monocytes is associated with susceptibility to carriage in older adults**

259 Given the lack of monocyte recruitment, we analysed expression levels of CD14, CD16 and HLA-DR on  
260 monocytes. Expression levels of CD14 but not HLA-DR or CD16 were significantly lower on monocytes  
261 before challenge (day -5) in susceptible compared to protected study participants (Fig. 6) indicating a  
262 dominance of intermediate monocytes in the nasal mucosa of susceptible older adults in agreement  
263 with deconvolution analysis of nasal transcriptome data (Fig. 4e). In protected older adults, the  
264 expression levels of CD16 increased on Day2 after challenge (Fig. 6).

265

### 266 **Discussion**

267 Exposure to respiratory pathogens occurs in the upper respiratory tract and immunological responses  
268 here are critical for either the establishment or clearance of infection. Failure to clear infection  
269 increases the risk of microaspiration of pathogens into the lung and development of pneumonia. Older  
270 adults are at an increased risk of pneumococcal disease although rates, duration and densities of *S.*  
271 *pneumoniae* colonization in the upper respiratory tract are comparable or lower than those observed  
272 in younger adults<sup>16,29</sup>. Age has been associated with cellular senescence which in turn drives  
273 “inflammaging” akin to chronic inflammation with the release of proinflammatory cytokines and  
274 increased vascular permeability<sup>14</sup>. Aging alters the innate immune response with changes in  
275 neutrophil recruitment into tissue, reduces phagocytosis and NETosis and reduced phagocytosis and  
276 antigen presentation by macrophages and dendritic cells (reviewed in <sup>30</sup>). An alternative and not  
277 necessarily contradictory view is that changes in cellular composition and response to recall antigens  
278 during aging are appropriate adaption to life-long exposure to pathogens with “inflammaging” as an  
279 early sign of underlying disease independent of age <sup>31</sup>. Here we investigated the immune response in

280 nasal tissue before and after pneumococcal controlled human infection in healthy older adults and  
281 compared results with existing data of younger adults<sup>9</sup>. Remarkably, we observed that older adults  
282 who became colonized presented with a susceptibility profile both at the transcriptional and cellular  
283 level before pneumococcal challenge.

284 Analysis of the nasal transcriptome revealed overexpression of genes associated with the reactome  
285 pathway “neutrophil degranulation” in older susceptible adults compared to those protected from  
286 pneumococcal colonization. Granulocytes, the majority of which are neutrophils, are abundant in the  
287 nasal mucosa and the first line of defence against bacterial infection through mechanisms such as  
288 antibody-mediated phagocytosis, production of radical oxygen species, degranulation and NETosis.  
289 While the frequency of granulocytes remained unchanged before and after pneumococcal challenge  
290 in older study participants, expression levels of genes associated with the reactome pathway  
291 “neutrophil degranulation” positively correlated with MPO concentration in nasal lining fluid and  
292 negatively correlated with CD16 expression levels on granulocytes, both of which indicate higher  
293 activation of neutrophils in the nasal mucosa of susceptible adults before pneumococcal challenge.

294 Although older adults had higher levels of MPO compared to younger adults before pneumococcal  
295 challenge, there were no differences between susceptible and protected older adults and were  
296 maintained at comparable level after challenge. It has been reported that with age, the microbiome  
297 of the nasal and oral cavity is no longer distinct<sup>32</sup> but whether this contributes to increases risk of  
298 disease is unknown. Although the exact driver of increased activation of neutrophils in susceptible  
299 older adults we report here require further investigation, it may result in local tissue damage which in  
300 turn may increase adhesion and micro-invasion of pneumococcus in the nasal mucosa<sup>33</sup>.

301 It is also noteworthy that the *FCAR* gene encoding the Fc $\alpha$ R was 3-fold overexpressed in susceptible  
302 adults before pneumococcal challenge. Although anti-pneumococcal secretory IgA is cleaved by the *S.*  
303 *pneumoniae* IgA1 protease (ZmpA), it is an important opsonin for other viral and bacterial pathogens.  
304 Gene expression levels of *FCRG3A* and *FCGR3B*, encoding Fc $\gamma$ RIIIA expressed on NK cells and  
305 monocytes and Fc $\gamma$ RIIIB expressed on neutrophils, increased two days after pneumococcal challenge  
306 in susceptible study participants, although increased expression of CD16 (Fc $\gamma$ RIII) was not evident at  
307 the cellular level. It has been reported in other studies<sup>34,35</sup> that CD16 expression is reduced on  
308 neutrophils from older adults and associated with reduced phagocytosis of pneumococcus. We  
309 observed that CD16 expression was generally lower in susceptible study participants only both before  
310 and after pneumococcal challenge. CD16 is a GPI-anchored protein and rapidly shed from the surface  
311 of granulocytes upon activation or apoptosis which may explain the discrepancy between  
312 transcriptional and cellular data. CD16-mediated signalling upon crosslinking with immune complexes  
313 depends on association of CD16 with CD32 (Fc $\gamma$ RII). Shedding of CD16 may result in better accessibility

314 of FcγRIIA (CD32) on the surface of neutrophils enhancing subsequent Fc-mediated phagocytosis or  
315 extracellular killing of bacteria<sup>36</sup>. Although the role of FcR-mediated phagocytosis by neutrophils in the  
316 nasal mucosa has to be confirmed at the functional level, we speculate that increased expression of  
317 Fc-receptors on nasal neutrophils of susceptible older adults after colonization onset may contribute  
318 to the clearance of pneumococci.

319 In our study, the concentration of both CXCL10 and the related cytokine CXCL9 were increased at the  
320 protein level and transcriptional level in older susceptible adults compared to protected older adults  
321 before pneumococcal challenge. CXCL10 and the closely related CXCL9 are largely induced by IFN $\gamma$  and  
322 chemoattractants for NK- and T cells, important for the clearance of viral infections. Increased  
323 concentrations of CXCL10 have been reported in nasal lining fluid before challenge with RSV in those  
324 who developed cold symptoms<sup>37</sup> and younger study participants receiving the nasal live attenuated  
325 influenza vaccine (LAIV) or with asymptomatic viral infection before pneumococcal challenge were  
326 associated with increased pneumococcal load<sup>9</sup>. In a recent study evaluating the use of high levels of  
327 CXCL10 in nasal lining fluids as a marker for undiagnosed viral infections, the authors detected a  
328 distinct profile of high levels of CXCL10 together with neutrophilic inflammation in bacterial and viral  
329 co-infections<sup>38</sup>. However, it is unlikely that the increased CXCL10 concentration in our study was due  
330 to viral infection because individuals with an asymptomatic viral infection were excluded from our  
331 analysis. The role of CXCL10 in bacterial infections is less clear. Increased CXCL10 concentrations were  
332 also associated with pneumonia in animal models of pneumococcal disease and it is also a promising  
333 marker which distinguished between CAP caused by *Staphylococcus aureus* or *S. pneumoniae* with  
334 higher levels detected in pneumococcal CAP<sup>39</sup>. Furthermore, CXCL10 can be produced by tissue-  
335 infiltrating neutrophils which express its receptor CXCR3 and acts on these neutrophils in an autocrine  
336 fashion followed by degranulation, ROS production and chemotaxis thus contributing to airway  
337 inflammation<sup>40</sup>.

338 High serum concentrations of CXCL9 are a strong predictor of cellular aging and cardio-vascular health  
339 even in healthy adults<sup>41</sup>. It is produced by endothelial cells, macrophages and neutrophils<sup>42</sup>. Whether  
340 CXCL9 is indicative of neutrophilic inflammation or produced by endothelial cells in the nasal mucosa  
341 in our study remains unclear but given its role in biological aging, its association with increased  
342 susceptibility to colonization with *S. pneumoniae* requires further investigation and if confirmed may  
343 offer an opportunity to identify older adults at greater risk of pneumococcal infection.

344 Another important observation was the lack of recruitment of monocytes into the nasal mucosa after  
345 pneumococcal challenge unlike younger adults<sup>9</sup>. It is not known whether CCL2 is not induced or  
346 expression of the CCL2 receptors CCR2 and CCR4 is impaired. However, both CCL2 and CCR2  
347 expression on monocytes are crucial for additional recruitment of and clearance of pneumococcus by

348 monocytes<sup>43</sup>. A recent study in a mouse model pneumococcal pneumonia suggested that age is  
349 associated with higher expression of CCR2 on monocytes but reduced phagocytosis of *S.*  
350 *pneumoniae*<sup>44</sup>. Therefore, it will be important to analyse the phenotype and function of monocytes  
351 over the course of colonization in an experimental infection model in more detail, together with the  
352 frequency and function of dendritic cells, both in healthy younger and older adults since both  
353 populations play a role in the activation of adaptive immune responses both in the nasal mucosa and  
354 systemically.

355 Given that in our study population, older adults cleared pneumococcal infection from the nasal  
356 mucosa without showing higher bacterial densities or any discernible delay in colonization duration,  
357 the question arises how the above changes in the nasal mucosa at the cellular and transcriptional level  
358 reflect the increased risk of older adults to develop pneumococcal disease.

359 Although the upper and lower respiratory tract differ in composition in both type and frequency of  
360 specialised epithelial cells and immune cells, there is sufficient overlap between compartments as  
361 assessed at the single cell level scRNAseq<sup>45-47</sup>. One possible explanation is that older adults have  
362 physiological changes such as reduced mucociliary clearance and increased expression of host  
363 receptors binding *S. pneumoniae* that leads to increased micro-aspiration into their lungs<sup>48-51</sup>. Micro-  
364 aspiration of pneumococcus into the lung may result in more pronounced inflammation with  
365 increased tissue damage if neutrophils are recruited or activated in a similar manner to those observed  
366 in the nasopharynx. Neutrophils in the lung are found in increased frequency in the lung and  
367 contribute to inflammation during bacterial and viral infections<sup>52-54</sup>. In addition, adults at risk of  
368 pneumonia have a delay in lung efferocytosis - the phagocytic clearance of apoptotic cells - following  
369 community acquired pneumonia<sup>55</sup>. In a mouse model of pneumococcal and viral co-infection, older  
370 mice showed rapid activation of neutrophils in the lung in the absence of increased bacterial burden  
371 suggesting that dysregulation of immune responses are a major factor contributing to pneumonia<sup>56</sup>.  
372 Understanding the role of individual pathogenic bacteria such as pneumococcus and its relationship  
373 with activation (or lack of) of immunological pathways that could result in increased susceptibility to  
374 pneumococcal disease are a prerequisite for future studies analysing in detail the interaction between  
375 bacterial and viral infection in clinically vulnerable populations, and thus improving diagnosis and  
376 treatment.

377

## 378 **Online Methods:**

### 379 ***Study Design & Demographics***

380 Healthy adults aged 50-84 were inoculated with an estimated 80,000 CFU per nostril of *Streptococcus*  
381 *pneumoniae* serotype 6B (strain BHN418 (29), GenBank accession number ASHP00000000.1) as

382 previously described<sup>7,57</sup>. Key eligibility criteria included capacity to give informed consent, no  
383 immunocompromised state or contact with susceptible individuals or children, no pneumococcal or  
384 influenza vaccine or infection in the last 2 years and not having taken part in EHPC studies in the past  
385 3 years. All volunteers gave written informed consent, and research was conducted in compliance with  
386 all relevant ethical regulations. Participants who carried non-experimental pneumococcal strains at  
387 baseline (day -5) or had a viral infection were excluded from all analyses.

388 Ethical approval was provided by the East Liverpool National Health Service Research and Ethics  
389 Committee (reference numbers 15/NW/0146 and 14/NW/1460) and Human Tissue Authority licensing  
390 number 12548.

391 Detailed demographic data of older adults >50yrs can be found in Adler 2021<sup>16</sup>. For comparison, data  
392 from younger adults who were part of a control group of an Influenza co-infection study were re-  
393 analysed<sup>9,18</sup>. Some data on baseline (day -5) nasal cell populations before inoculation with Spn6B were  
394 presented in a pre-print<sup>58</sup> but the analysis of baseline nasal cell data presented here is sufficiently  
395 different and substantially extends the data presented in the preprint.

396

#### 397 ***Determination of carriage***

398 Nasal washes were performed at day -5 and on days 2, 7, 9, 14, 22 and 29 post-challenge and  
399 colonization determined by the presence of pneumococcus in nasal wash samples at any time point  
400 post-challenge up to and including day 29, detected using classical microbiology<sup>7,57</sup>.

401

#### 402 ***Nasal curettage***

403 Nasal cells were collected on days -5, 2, 7, 9 and 29 by scraping the inferior turbinate from participants  
404 consecutively using four curettes (Rhino-pro®, Arlington Scientific), as described previously<sup>25</sup>. Two  
405 curette samples were collected into PBS + 5mM EDTA and 0.5% heat inactivated FBS for  
406 immunophenotyping and an additional two curette samples were collected into RLT (Qiagen) and  
407 stored at -80°C for transcriptome analysis.

408

#### 409 ***Nasal Cell Immunophenotyping***

410 Cells were dislodged from curettes and processed immediately. Briefly, the nasal cells were stained  
411 for 15 minutes with LIVE/DEAD® Fixable Violet Dead Cell Stain (ThermoFisher) before the addition of  
412 a cocktail of monoclonal antibodies for 20 minutes at 4°C protected from light (Supplementary Table  
413 S7) Following incubation, cells were washed (440g for 5 min) with 3mL PBS, filtered through a 70µm  
414 mesh filter (ThermoFisher) and resuspended in 200µL Cell FIX™ (BD Biosciences). Samples were  
415 acquired on a LSR II cytometer (BD Biosciences) and analysed using Flowjo software version 10

416 (Treestar). Compensation matrices were set using compensation beads (BD Biosciences and  
417 ThermoFisher). Samples with less than 500 CD45+ leukocytes or 250 EpCam+ epithelial cells were  
418 excluded from analysis. To adjust for the variability of cells collected within and between study  
419 participants, absolute cell counts of the target populations were normalized with the absolute number  
420 of epithelial cells. The gating strategy is shown in Supplementary Fig. 5.

421

#### 422 ***Anti-6B capsular polysaccharide IgG***

423 Anti-6B CPS IgG titres were measured using a modification of the WHO enzyme-linked immunosorbent  
424 assay (ELISA) protocol. Nasal wash (NW) samples and reference serum 89SF (US Food and Drug  
425 Administration (FDA)) were depleted of cell wall polysaccharide (CWPS) antibodies by pre-absorption  
426 with 10µg/mL solution of CWPS (Statens Serum Institut, Copenhagen, Denmark) in phosphate-  
427 buffered saline (PBS) blocked with heat-inactivated foetal bovine serum (ThermoFisher, Basingstoke  
428 UK) for 30 minutes. 96-well plates (Maxisorp microtiter, Nunc, Roskilde, Denmark) were coated with  
429 5µg/mL purified pneumococcal 6B capsular polysaccharide (Statens Serum Institut) overnight at 4°C,  
430 washed and blocked with 1% BSA. Reference serum 89SF was serially diluted as a standard curve.  
431 Samples and standards were transferred to plates and incubated for two hours at room temperature,  
432 followed by three washes with PBS/0.05% Tween (PBS-T), before incubation with the secondary  
433 antibody diluted 1:4000 (A9544; Sigma-Aldrich Corporation, Dorset, UK) for 90 minutes. Wells were  
434 washed as before and developed by incubation with p-nitrophenylphosphate (Sigma-Aldrich  
435 Corporation) for 15-20 minutes at room temperature. Optical densities were measured at 405nm  
436 using a FLUOstar Omega plate reader (BMG Labtech GmbH, Ortenberg, Germany). Samples were  
437 analyzed in duplicate, and samples with a coefficient of variation (CV) of > 25% were excluded.

438

#### 439 ***Nasal Fluid Multiplex Cytokine Measurement***

440 Nasal lining fluid was collected using nasosorption filters (Nasosorption, Hunt Developments) and  
441 stored at -80°C. For detection of cytokines in the nasal lining fluid, nasosorption samples were eluted  
442 in 100µl assay buffer (Thermo Fisher Scientific) by centrifugation at 2800g for 10 minutes. The eluate  
443 was cleared by further centrifugation at 16,000g for 10 min. Samples were analysed on an LX200 using  
444 a 30-plex magnetic human Luminex cytokine kit (LHC6003M; Thermo Fisher Scientific) and analysed  
445 with xPonent3.1 software following the manufacturer's instructions. Samples were analysed in  
446 duplicate, and samples with a coefficient of variation (CV) of > 25% were excluded.

447

#### 448 ***Myeloperoxidase ELISA***

449 Levels of myeloperoxidase in the nasal wash were determined using the Human Myeloperoxidase  
450 DuoSet ELISA Kit (R&D Systems, Abingdon, UK) following manufacturer's instructions. Briefly, 96-well  
451 plates (Maxisorp microtiter, Nunc, Roskilde, Denmark) were coated with 4µg/mL capture antibody  
452 overnight and blocked with 1% BSA in PBS for 1 hour at room temperature. Samples and standards  
453 were incubated in assay plates for 2 hours at room temperature. Detection antibody (50ng/ml) was  
454 added to the wells for 2 hours at room temperature, followed by 20 minutes incubation with  
455 Streptavidin-HRP (1:200; Fisher Scientific) at room temperature. The plates were developed using  
456 TMB-Turbo Substrate (Fisher Scientific) for 20 minutes and the reaction stopped by adding 2N H<sub>2</sub>SO<sub>4</sub>  
457 in a 1:1 ratio. Optical density was measured at 450nm and corrected for optical imperfection (540nm).  
458 All samples were run in duplicate with a CV <25%.

459

#### 460 ***Nasal Cell RNA Sequencing and Bioinformatic Analysis***

461 *RNA sequencing:* Nasal cells were collected in RLT (QIAGEN) and stored at -80°C until extraction. RNA  
462 extraction (RNeasy; QIAGEN), sample integrity assessment (Bioanalyzer; Agilent 2100), library  
463 preparation and RNA sequencing (BGISEQ-500RS) were performed at the Beijing Genome Institute.  
464 Quality control of raw sequencing data was done using FastQC tool. Mapping to a human reference  
465 genome assembly (GRCh38) was done using STAR 2.5.0a<sup>59</sup>. Read counts from the resulting binary  
466 alignment map (BAM) files were obtained with featureCounts<sup>60</sup> using a general transfer format (GTF)  
467 gene annotation from the Ensembl database<sup>61</sup>The R/Bioconductor package DESeq2 (version 1.34.0)  
468 was used to identify differentially expressed genes among the samples after removing absent features  
469 (zero counts in more than 75% of samples)<sup>62</sup>. Genes with a p-value of < 0.05 and an absolute fold-  
470 change of > 2.0 were identified as differentially expressed. The complete set of raw sequences were  
471 deposited at the NCBI through BioProject (PRJNAXX).

472 *Functional analysis:* We performed two functional analysis approaches regarding the biological  
473 pathways related to ageing or carriage status. Gene Set Variation Analysis (GSVA) was used to identify  
474 pathways independent of comparison between groups of samples using R package gsva (version  
475 1.42.0) and log<sub>2</sub> count per million (CPM) matrix count, and the parameters kcdf="Gaussian",  
476 min.sz=15, and max.sz=500. Gene Set Enrichment Analysis (GSEA) was used to identify which  
477 pathways were represented in the ranked transcriptome (log<sub>2</sub> fold-change), independently of the DE  
478 cut-off<sup>63</sup> using R package fgsea (version 1.20.0). The criteria used for statistical enrichment for GSEA  
479 were a p value < 0.05 and enrichment of at least five genes for each pathway. The database used for  
480 functional analysis was Reactome, release 79 and Pathway Browser version 3.7<sup>50</sup>.

481 *Co-expression analysis:* For co-expression analysis, counts were normalized using log<sub>2</sub> counts per  
482 million (CPM), and the log<sub>2</sub> fold-change was calculated for each time point in a subject-wise manner.

483 The co-expression analysis was performed separately for each group (older and younger, using  
484 baseline, day 2, and day 9 after pneumococcal challenge and susceptible and protected samples) using  
485 the R /Bioconductor package CEMiTool (version 1.18.1)<sup>19</sup>. This package unifies the discovery and the  
486 analysis of co-expression gene modules, evaluating whether modules contain genes that are over-  
487 represented by specific pathways or altered in a specific sample group. A p-value = 0.05 was applied  
488 for filtering genes with low expression levels.

489 *M2 CEMiTool module protein-protein interaction network*: To identify the relationship between genes  
490 (protein-protein interaction) from M2 CEMiTool modules, we filtered which genes were differentially  
491 expressed at least one comparison (susceptible vs protected at baseline, day 2 or day 9 after  
492 challenge), and we used the networkanalyst.ca web-based tool (version 3.0). We used the “Gene List  
493 Input” option, a list of M2 DE gene symbols and StringDB<sup>64</sup> to find the genes interaction evidence  
494 under parameters, confidence score cutoff = 900, not required experimental evidence and zero-order  
495 network to use just genes from the input list.

496 *Deconvolution analysis*: Cell type estimation was performed using the CIBERSORTx web-based tool<sup>65</sup>,  
497 with log<sub>2</sub> count per million (CPM) gene expression and single-cell atlas data from sorted monocytes  
498 cells<sup>66</sup> and bone marrow and mature neutrophils bulk sequencing<sup>67</sup> from healthy human donors. Both  
499 studies were used as a reference to predict cell type proportion.

500

## 501 **Statistical Analysis**

502 To identify the correlation between a pair of features, we first imputed the missing data using the R  
503 package missForest (version 1.5) and then calculated the Spearman rho coefficient and p values using  
504 the R base function cor.test.

505 Two-tailed statistical tests were used throughout the study. For comparison between study groups,  
506 Mann Whitney test was used. For comparison of study participants within a group over time,  
507 Friedmann test with Dunn Hochberg correction was used. P values were considered significant at  
508 <0.05 unless stated otherwise. Data were analysed using GraphPad prism (version 9) or R studio  
509 (2021.09.2 Build 382) and R (version 4.1.2).

510

## 511 **Acknowledgements**

512 We thank all study participants for their contribution and generous donation of time and tissue  
513 samples. We acknowledge the invaluable contribution of the clinical and laboratory team collecting  
514 and processing samples. This study was funded by the Melinda Gates Foundation (grant OPP1117728);  
515 the UK Medical Research Council (grant MR/M011569/1).

516



517

518 **References**

519

520 1. Mitsi, E. *et al.* Nasal Pneumococcal Density Is Associated with Microaspiration and Heightened  
521 Human Alveolar Macrophage Responsiveness to Bacterial Pathogens. *Am J Respir Crit Care Med* **201**,  
522 335–347 (2020).

523 2. Wall, E. C., Chan, J. M., Gil, E. & Heyderman, R. S. Acute bacterial meningitis. *Curr Opin Neurol* **34**,  
524 386–395 (2021).

525 3. Welte, T., Torres, A. & Nathwani, D. Clinical and economic burden of community-acquired  
526 pneumonia among adults in Europe. *Thorax* **67**, 71 (2012).

527 4. Jain, S. *et al.* Community-Acquired Pneumonia Requiring Hospitalization among U.S. Adults. *New*  
528 *Engl J Medicine* **373**, 415–427 (2015).

529 5. Bijlsma, M. W. *et al.* Community-acquired bacterial meningitis in adults in the Netherlands, 2006–  
530 14: a prospective cohort study. *Lancet Infect Dis* **16**, 339–347 (2016).

531 6. Torres, A. *et al.* Burden of pneumococcal community-acquired pneumonia in adults across Europe:  
532 A literature review. *Resp Med* **137**, 6–13 (2018).

533 7. Ferreira, D. M. *et al.* Controlled human infection and rechallenge with *Streptococcus pneumoniae*  
534 reveals the protective efficacy of carriage in healthy adults. *Am J Respir Crit Care Med* **187**, 855–864  
535 (2013).

536 8. Nikolaou, E. *et al.* Experimental Human Challenge Defines Distinct Pneumococcal Kinetic Profiles  
537 and Mucosal Responses between Colonized and Non-Colonized Adults. *mBio* **12**, (2021).

538 9. Jochems, S. P. *et al.* Inflammation induced by influenza virus impairs human innate immune  
539 control of pneumococcus. *Nat Immunol* **388**, 1–14 (2018).

540 10. Jochems, S. P. *et al.* Innate and adaptive nasal mucosal immune responses following  
541 experimental human pneumococcal colonization. *J Clin Invest* **130**, 4523–4538 (2019).

542 11. Pennington, S. H. *et al.* Polysaccharide-Specific Memory B Cells Predict Protection against  
543 Experimental Human Pneumococcal Carriage. *Am J Respir Crit Care Med* **194**, 1523–1531 (2016).

544 12. Wunderink, R. G. & Waterer, G. Advances in the causes and management of community acquired  
545 pneumonia in adults. *BMJ* **358**, j2471 (2017).

546 13. Franceschi, C. & Campisi, J. Chronic Inflammation (Inflammaging) and Its Potential Contribution  
547 to Age-Associated Diseases. *J. Gerontol.: Ser. A* **69**, S4–S9 (2014).

548 14. Fulop, T. *et al.* Immunosenescence and Inflamm-Aging As Two Sides of the Same Coin: Friends or  
549 Foes? *Front. Immunol.* **8**, 1960 (2018).

550 15. Brooks, L. R. K. & Mias, G. I. *Streptococcus pneumoniae*'s Virulence and Host Immunity: Aging,  
551 Diagnostics, and Prevention. *Front Immunol* **9**, 1366 (2018).

- 552 16. Adler, H. *et al.* Experimental Human Pneumococcal Colonization in Older Adults Is Feasible and  
553 Safe, Not Immunogenic. *Am J Respir Crit Care Med* **203**, 604–613 (2021).
- 554 17. Smith, E. L. *et al.* Upper airways colonisation of *Streptococcus pneumoniae* in adults aged 60  
555 years and older: A systematic review of prevalence and individual participant data meta-analysis of  
556 risk factors. *J Infect* **81**, 540–548 (2020).
- 557 18. Carniel, B. F. *et al.* Pneumococcal colonization impairs mucosal immune responses to live  
558 attenuated influenza vaccine. *Jci Insight* **6**, e141088 (2021).
- 559 19. Russo, P. S. T. *et al.* CEMiTool: a Bioconductor package for performing comprehensive modular  
560 co-expression analyses. *BMC Bioinformatics* **19**, 56 (2018).
- 561 20. Rasmussen, L. J. H., Petersen, J. E. V. & Eugen-Olsen, J. Soluble Urokinase Plasminogen Activator  
562 Receptor (suPAR) as a Biomarker of Systemic Chronic Inflammation. *Front. Immunol.* **12**, 780641  
563 (2021).
- 564 21. Angata, T. Lectin in Host Defense Against Microbial Infections. *Adv. Exp. Med. Biol.* **1204**, 215–  
565 230 (2020).
- 566 22. Brckalo, T. *et al.* Functional analysis of the CD300e receptor in human monocytes and myeloid  
567 dendritic cells. *Eur. J. Immunol.* **40**, 722–732 (2010).
- 568 23. Hommes, T. J. *et al.* Triggering receptor expressed on myeloid cells-1 (TREM-1) improves host  
569 defence in pneumococcal pneumonia. *J. Pathol.* **233**, 357–367 (2014).
- 570 24. Vangeti, S. *et al.* Human influenza virus infection elicits distinct patterns of monocyte and  
571 dendritic cell mobilization in blood and the nasopharynx. *Elife* **12**, e77345 (2023).
- 572 25. Jochems, S. P. *et al.* Novel Analysis of Immune Cells from Nasal Microbiopsy Demonstrates  
573 Reliable, Reproducible Data for Immune Populations, and Superior Cytokine Detection Compared to  
574 Nasal Wash. *PLoS ONE* **12**, e0169805 (2017).
- 575 26. Tosi, M. F. & Zakem, H. Surface expression of Fc gamma receptor III (CD16) on chemoattractant-  
576 stimulated neutrophils is determined by both surface shedding and translocation from intracellular  
577 storage compartments. *J. Clin. Investig.* **90**, 462–470 (1992).
- 578 27. Jost, C. *et al.* Intracellular localization and de novo synthesis of FcRIII in human neutrophil  
579 granulocytes. *Blood* **75**, 144–151 (1990).
- 580 28. Simmons, S. R., Bhalla, M., Herring, S. E., Tchalla, E. Y. I. & Ghanem, E. N. B. Older but Not Wiser:  
581 the Age-Driven Changes in Neutrophil Responses during Pulmonary Infections. *Infect. Immun.* **89**,  
582 (2021).
- 583 29. Almeida, S. T. *et al.* Low Prevalence of Pneumococcal Carriage and High Serotype and Genotype  
584 Diversity among Adults over 60 Years of Age Living in Portugal. *PLoS ONE* **9**, e90974 (2014).
- 585 30. Bleve, A. *et al.* Immunosenescence, Inflammaging, and Frailty: Role of Myeloid Cells in Age-  
586 Related Diseases. *Clin Rev Allerg Immu* **64**, 123–144 (2023).

- 587 31. Pawelec, G. *et al.* The conundrum of human immune system “senescence.” *Mech Ageing Dev*  
588 **192**, 111357–111357 (2020).
- 589 32. Whelan, F. J. *et al.* The Loss of Topography in the Microbial Communities of the Upper  
590 Respiratory Tract in the Elderly. *Ann. Am. Thorac. Soc.* **11**, 513–521 (2014).
- 591 33. Weight, C. M. *et al.* Microinvasion by *Streptococcus pneumoniae* induces epithelial innate  
592 immunity during colonisation at the human mucosal surface. *Nat Comms* **10**, 3060 (2019).
- 593 34. Simell, B. *et al.* Aging reduces the functionality of anti-pneumococcal antibodies and the killing of  
594 *Streptococcus pneumoniae* by neutrophil phagocytosis. *Vaccine* **29**, 1929–1934 (2011).
- 595 35. Butcher, S. *et al.* Senescence in innate immune responses: reduced neutrophil phagocytic  
596 capacity and CD16 expression in elderly humans. *J Leukoc Biol* **6**, 881–886 (2001).
- 597 36. Wang, Y. & Jönsson, F. Expression, Role, and Regulation of Neutrophil Fcγ Receptors. *Front*  
598 *Immunol* **10**, 1958 (2019).
- 599 37. Habibi, M. S. *et al.* Neutrophilic inflammation in the respiratory mucosa predisposes to RSV  
600 infection. *Science* **370**, (2020).
- 601 38. Cheemarla, N. R. *et al.* Nasal host response-based screening for undiagnosed respiratory viruses:  
602 a pathogen surveillance and detection study. *Lancet Microbe* **4**, e38–e46 (2023).
- 603 39. Strehlitz, A., Goldmann, O., Pils, M. C., Pessler, F. & Medina, E. An Interferon Signature  
604 Discriminates Pneumococcal From Staphylococcal Pneumonia. *Front. Immunol.* **9**, 1424 (2018).
- 605 40. Ichikawa, A. *et al.* CXCL10-CXCR3 Enhances the Development of Neutrophil-mediated Fulminant  
606 Lung Injury of Viral and Nonviral Origin. *Am. J. Respir. Crit. Care Med.* **187**, 65–77 (2013).
- 607 41. Sayed, N. *et al.* An inflammatory aging clock (iAge) based on deep learning tracks multimorbidity,  
608 immunosenescence, frailty and cardiovascular aging. *Nat Aging* **1**, 598–615 (2021).
- 609 42. Tecchio, C. & Cassatella, M. A. Neutrophil-derived chemokines on the road to immunity. *Semin.*  
610 *Immunol.* **28**, 119–128 (2016).
- 611 43. Davis, K. M., Nakamura, S. & Weiser, J. N. Nod2 sensing of lysozyme-digested peptidoglycan  
612 promotes macrophage recruitment and clearance of *S. pneumoniae* colonization in mice. *J. Clin.*  
613 *Investig.* **121**, 3666–3676 (2011).
- 614 44. Puchta, A. *et al.* TNF Drives Monocyte Dysfunction with Age and Results in Impaired Anti-  
615 pneumococcal Immunity. *Plos Pathog* **12**, e1005368 (2016).
- 616 45. Poole, A. *et al.* Dissecting childhood asthma with nasal transcriptomics distinguishes  
617 subphenotypes of disease. *J Allergy Clin Immunol* **133**, 670-678.e12 (2014).
- 618 46. Lopez-Guisa, J. M. *et al.* Airway epithelial cells from asthmatic children differentially express  
619 proremodeling factors. *J. Allergy Clin. Immunol.* **129**, 990-997.e6 (2012).
- 620 47. Mihaylova, V. T. *et al.* Regional Differences in Airway Epithelial Cells Reveal Tradeoff between  
621 Defense against Oxidative Stress and Defense against Rhinovirus. *Cell Rep.* **24**, 3000-3007.e3 (2018).

- 622 48. Svartengren, M., Falk, R. & Philipson, K. Long-term clearance from small airways decreases with  
623 age. *Eur. Respir. J.* **26**, 609–615 (2005).
- 624 49. Oliveira-Maul, J. P. de *et al.* Aging, Diabetes, and Hypertension Are Associated With Decreased  
625 Nasal Mucociliary Clearance. *Chest* **143**, 1091–1097 (2013).
- 626 50. Schneider, J. L. *et al.* The aging lung: Physiology, disease, and immunity. *Cell* **184**, 1990–2019  
627 (2021).
- 628 51. Shivshankar, P., Boyd, A. R., Saux, C. J. L., Yeh, I. & Orihuela, C. J. Cellular senescence increases  
629 expression of bacterial ligands in the lungs and is positively correlated with increased susceptibility  
630 to pneumococcal pneumonia. *Aging Cell* **10**, 798–806 (2011).
- 631 52. Meyer, K. C., Rosenthal, N. S., Soergel, P. & Peterson, K. Neutrophils and low-grade inflammation  
632 in the seemingly normal aging human lung. *Mech. Ageing Dev.* **104**, 169–181 (1998).
- 633 53. Kulkarni, U. *et al.* Excessive neutrophil levels in the lung underlie the age-associated increase in  
634 influenza mortality. *Mucosal Immunol.* **12**, 545–554 (2019).
- 635 54. Ouwendijk, W. J. D. *et al.* Neutrophils set extracellular traps to injure lungs in COVID-19. *J. Infect.*  
636 *Dis.* **223**, jia050- (2021).
- 637 55. Zheng, D. J., Taka, M. A. & Heit, B. Role of Apoptotic Cell Clearance in Pneumonia and  
638 Inflammatory Lung Disease. *Pathogens* **10**, 134 (2021).
- 639 56. Joma, B. H. *et al.* A Murine Model for Enhancement of Streptococcus pneumoniae Pathogenicity  
640 upon Viral Infection and Advanced Age. *Infect. Immun.* **89**, e00471-20 (2021).
- 641 57. Gritzfeld, J. F. *et al.* Density and duration of experimental human pneumococcal carriage. *Clin.*  
642 *Microbiol. Infect.* **20**, O1145-51 (2014).
- 643 58. Reine, J. *et al.* Dynamic changes in innate immune and T cell function and composition at the  
644 nasal mucosa across the human lifespan. **2**, 141–29 (2019).
- 645 59. Dobin, A. *et al.* STAR: ultrafast universal RNA-seq aligner. *Bioinformatics* **29**, 15–21 (2013).
- 646 60. Liao, Y., Smyth, G. K. & Shi, W. featureCounts: an efficient general purpose program for assigning  
647 sequence reads to genomic features. *Bioinformatics* **30**, 923–930 (2014).
- 648 61. Yates, A. *et al.* Ensembl 2016. *Nucleic Acids Res* **44**, D710–D716 (2016).
- 649 62. Love, M. I., Huber, W. & Anders, S. Moderated estimation of fold change and dispersion for RNA-  
650 seq data with DESeq2. *Genome Biol* **15**, 550 (2014).
- 651 63. Subramanian, A. *et al.* Gene set enrichment analysis: A knowledge-based approach for  
652 interpreting genome-wide expression profiles. *Proc National Acad Sci* **102**, 15545–15550 (2005).
- 653 64. Szklarczyk, D. *et al.* The STRING database in 2023: protein–protein association networks and  
654 functional enrichment analyses for any sequenced genome of interest. *Nucleic Acids Res.* **51**, D638–  
655 D646 (2022).

656 65. Newman, A. M. *et al.* Determining cell type abundance and expression from bulk tissues with  
657 digital cytometry. *Nat. Biotechnol.* **37**, 773–782 (2019).

658 66. Villani, A.-C. *et al.* Single-cell RNA-seq reveals new types of human blood dendritic cells,  
659 monocytes, and progenitors. *Science* **356**, eaah4573 (2017).

660 67. Grassi, L. *et al.* Dynamics of Transcription Regulation in Human Bone Marrow Myeloid  
661 Differentiation to Mature Blood Neutrophils. *Cell Rep.* **24**, 2784–2794 (2018).

662

663

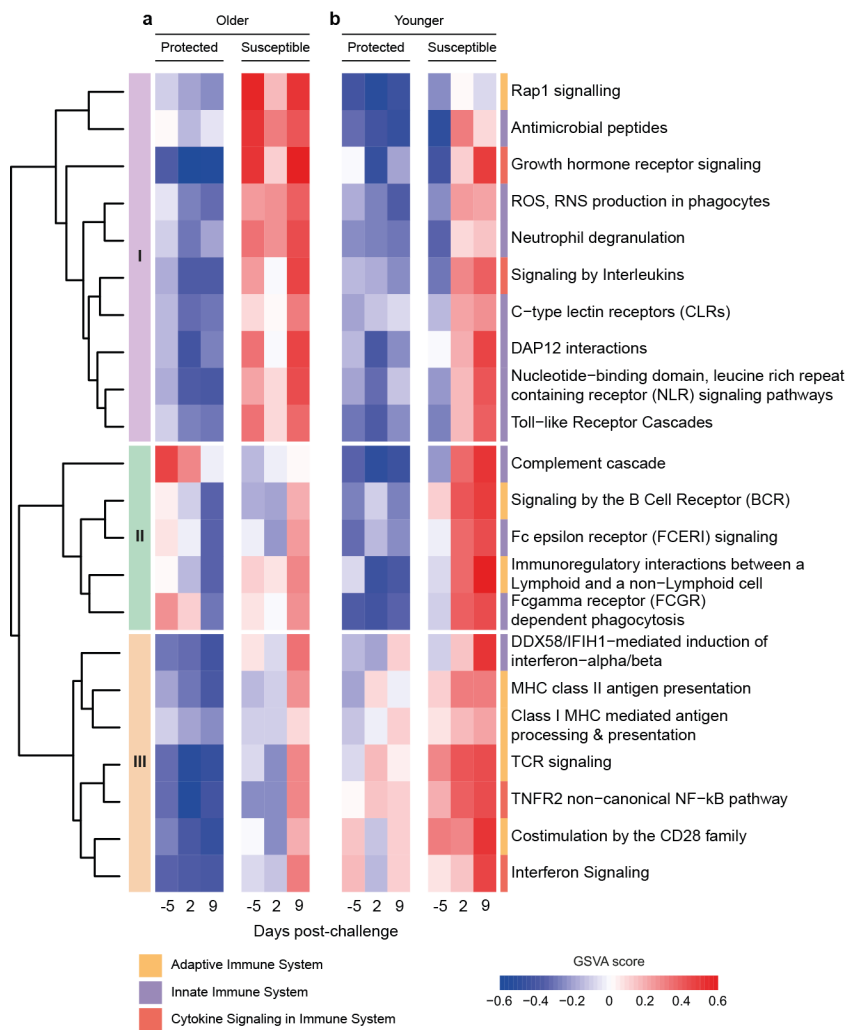

664

665

666 **Fig. 1. Gene expression analysis of nasal cells showed distinct patterns in older**  
 667 **adults susceptible to carriage before pneumococcal challenge. a,** Gene set  
 668 variance analysis (GSEA) of immune response pathways of nasal cells collected  
 669 before (day -5) and after (day 2, day 9) pneumococcal challenge of older and **b,**  
 670 younger study participants who were protected (carriage-negative) or susceptible  
 671 (carriage-positive). Based on Euclidean distance calculation, we identified three  
 672 groups: group I contains gene sets associated predominantly with innate immune  
 673 responses, group II and III are enriched for gene

674

675

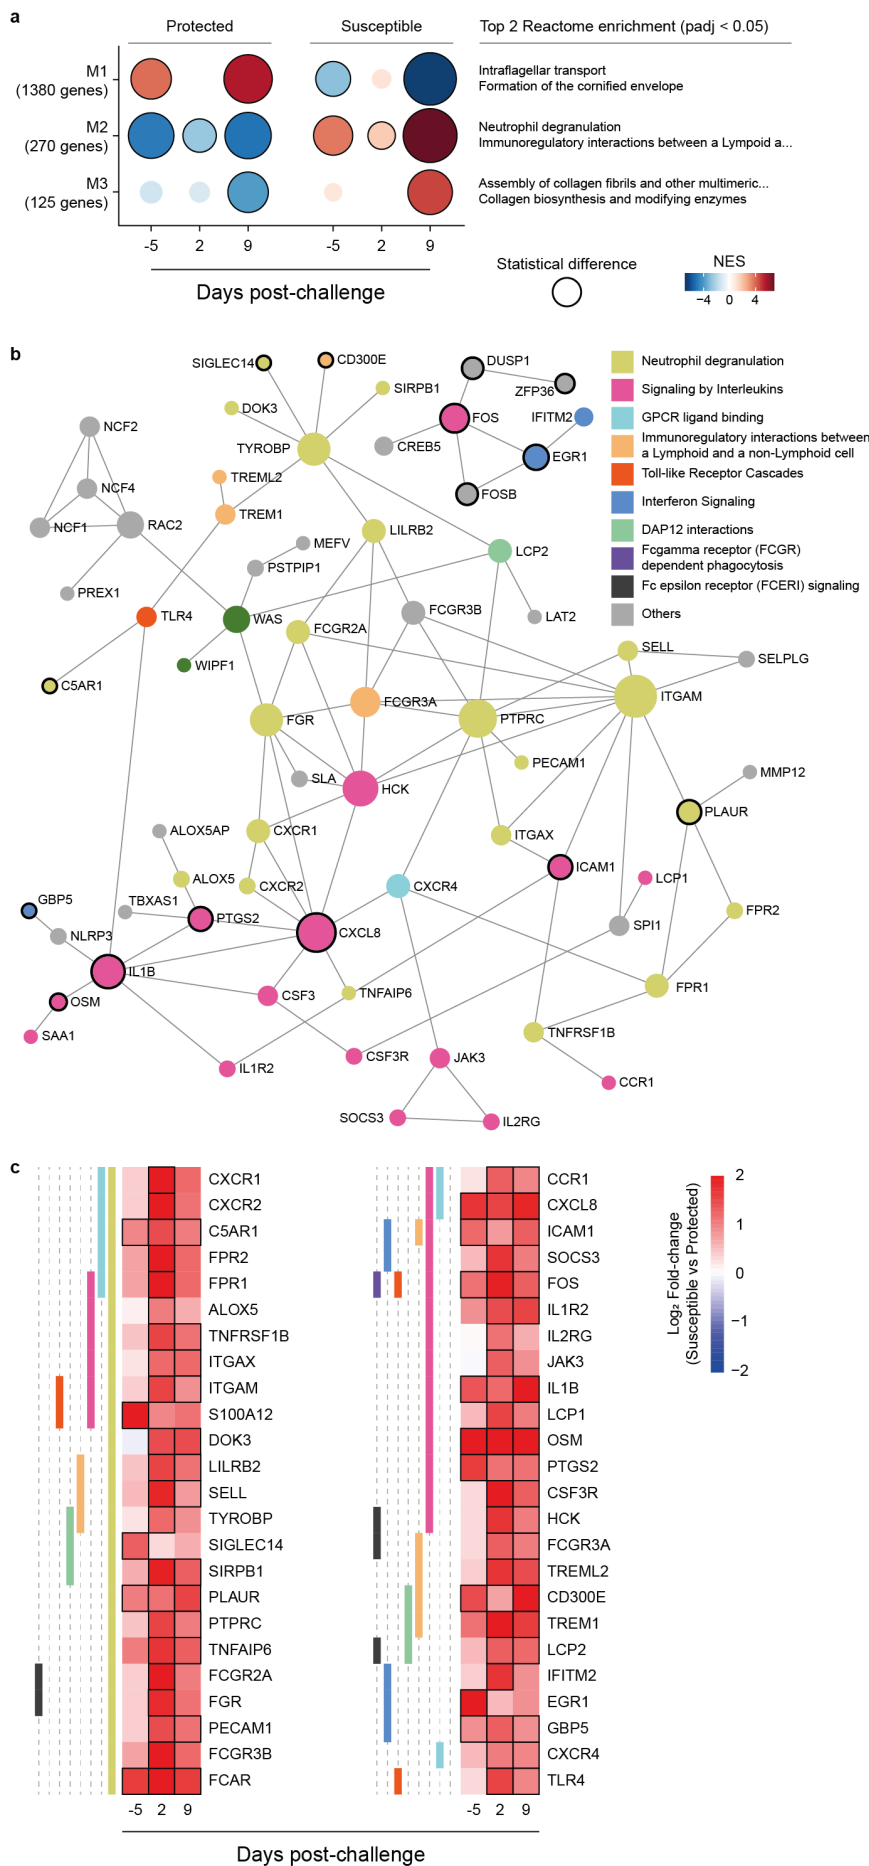

677 **Fig. 2. Co-expression analysis of nasal cell transcripts using protection-status and**  
678 **timepoints samples for study participants. a,** Co-expressed genes were determined by  
679 CEMiTool (Co-Expression Module identification Tool), assessing normalised gene expression  
680 profile using samples of protection-status (susceptible and protected), and across the  
681 timepoints (baseline (day -5), day 2, and day 9 post-challenge) and Over-Representation  
682 Analysis (enrichr function from R package clusterProfiler) to determine the biological function  
683 of each module genes using Reactome database (level 3 gene sets). Gene Set Enrichment  
684 Analysis (GSEA) tool and z-score values for each gene across all timepoints were used to  
685 determine whether module genes were positively (positive NES values) or negatively  
686 (negative NES values) enriched. **b,** Protein-protein interaction network using 216 M2 modules  
687 and differentially expressed genes (susceptible vs protected samples) at at least one  
688 timepoint. Genes are colour coded by Reactome pathway and those which were  
689 overexpressed at baseline are indicated by a black border. StringDB was used to determine  
690 protein-protein interactions using default parameters, a confidence score cut-off of 900 and  
691 not required experimental evidence (NetworkAnalysit.ca webtool). **c,** Heatmap showing log<sub>2</sub>  
692 fold-change of overexpressed genes within each pathway before and after pneumococcal  
693 challenge (susceptible vs protected samples). Criteria of differentially expressed genes were  
694 absolute log<sub>2</sub> fold-change > 1 and non-adjusted p value < 0.05.

695



696

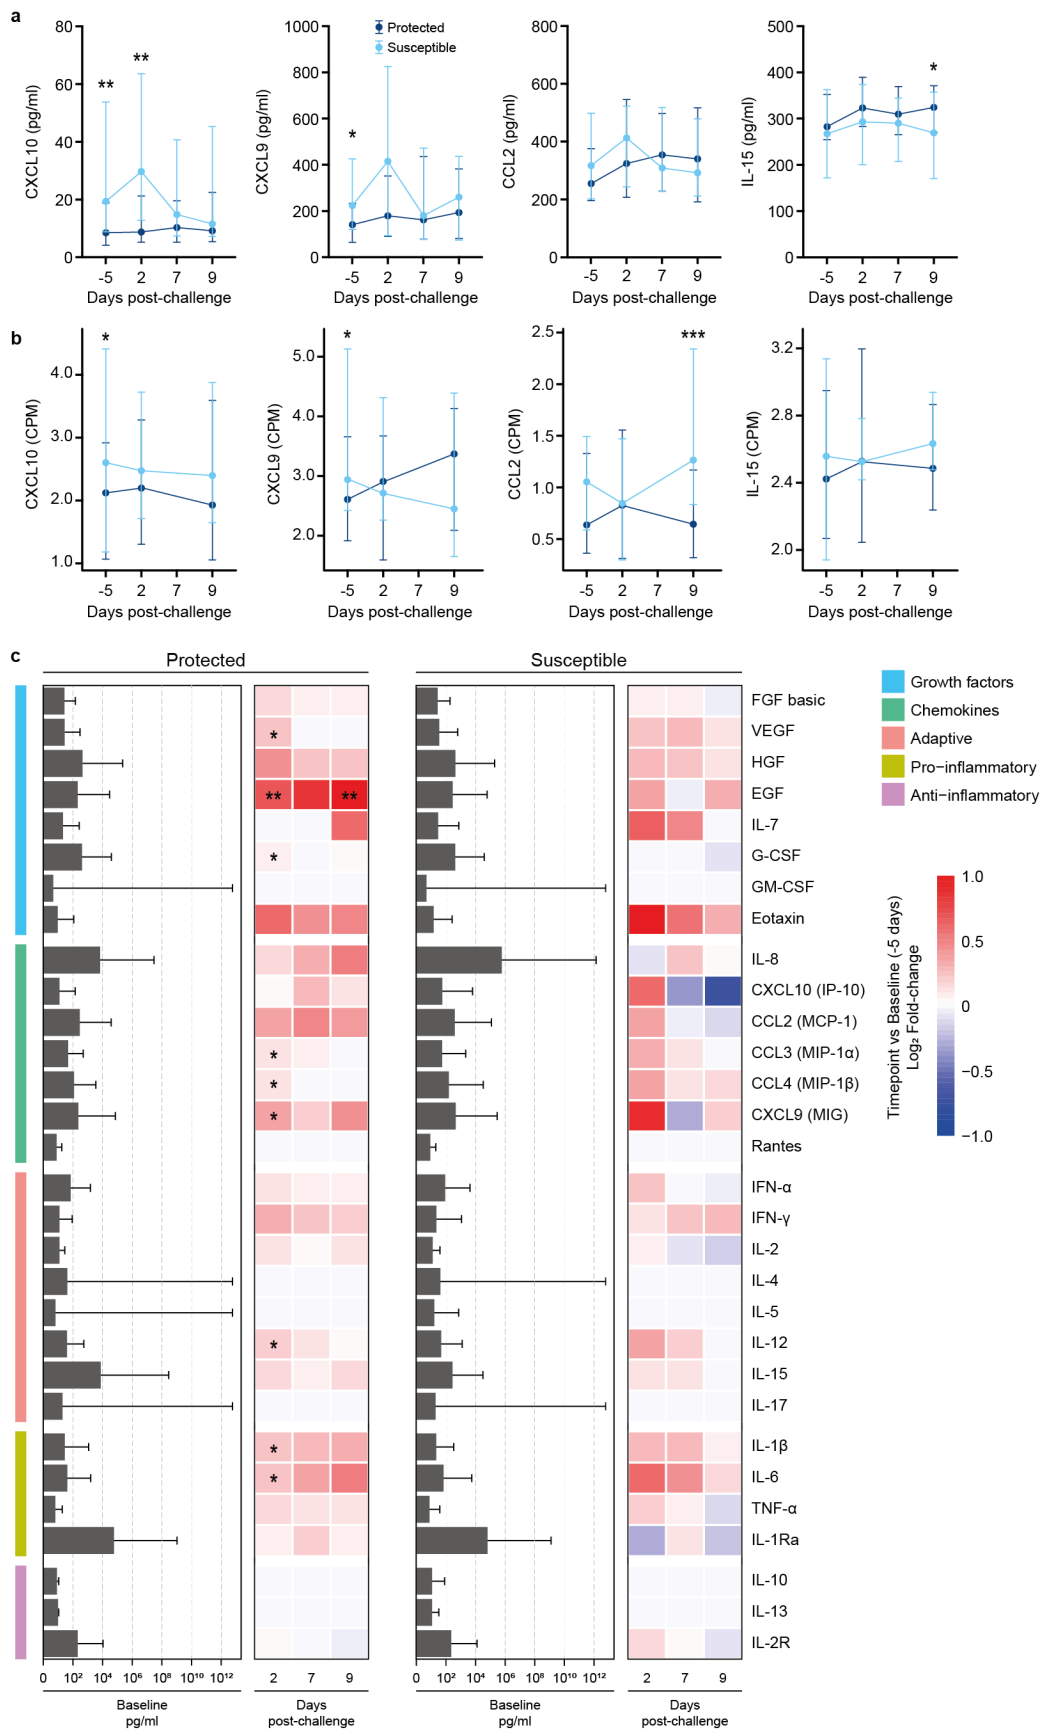

697

698 **Fig. 3. Changes in cytokine concentration in the nasal lining fluid of older adults**  
699 **experimentally challenged with *S. pneumoniae* 6B.** **a,** Line graphs showing the median  
700 and interquartile range of cytokine concentrations in the nasal lining fluid in older study  
701 participants before (day -5) and after (day 2, day 7 and day 9) pneumococcal challenge in  
702 susceptible (light blue line, n=22) and protected (dark blue line, n=35) study participants. In  
703 protected study participants, the concentration of IL-15 was higher at day 9 (Mann-Whitney U  
704 test, \* p=0.0344), and in susceptible study participants concentration of CXCL10 (IP-10) was  
705 higher at day -5 and day 2 (Mann-Whitney U test, \* p=0.00116, \*\* p=0.0044) and the  
706 concentration of CXCL9 (MIG) was higher at day -5 (Mann-Whitney U test, \* p=0.0419). No  
707 differences were observed for CCL2 (MCP-1). **b,** Line graphs showing the median and  
708 interquartile range of cytokine normalised gene expression (CPM= counts per million) in older  
709 study participants before (day -5) and after (day 2, and day 9) pneumococcal challenge in  
710 susceptible (light blue line, n=18) and protected (dark blue line, n=24) study participants. In  
711 susceptible study participants normalised gene expression of CXCL10 (IP-10) and CXCL9  
712 (MIG) was higher at day -5 (DESeq2 Wald test, \* p=0.00303, \* p=0.0210, respectively), and  
713 CCL2 was higher at day 9 (DESeq2 Wald test, \*\*\* p=0.000218). No differences were observed  
714 for IL-15. **c,** Bar graph showing the level of cytokines at baseline and heatmap depicting log2  
715 fold-change at day 2, 7, and 9 relatives to baseline (day -5) samples. The cytokines were  
716 grouped based on activity, adaptive, anti-inflammatory, chemokines, growth factors, and pro-  
717 inflammatory responses. The statistical test performed was the non-parametric Wilcoxon test.  
718 One asterisk (\*) indicates p-value < 0.05, and two asterisk (\*\*) for p-value < 0.01.

719

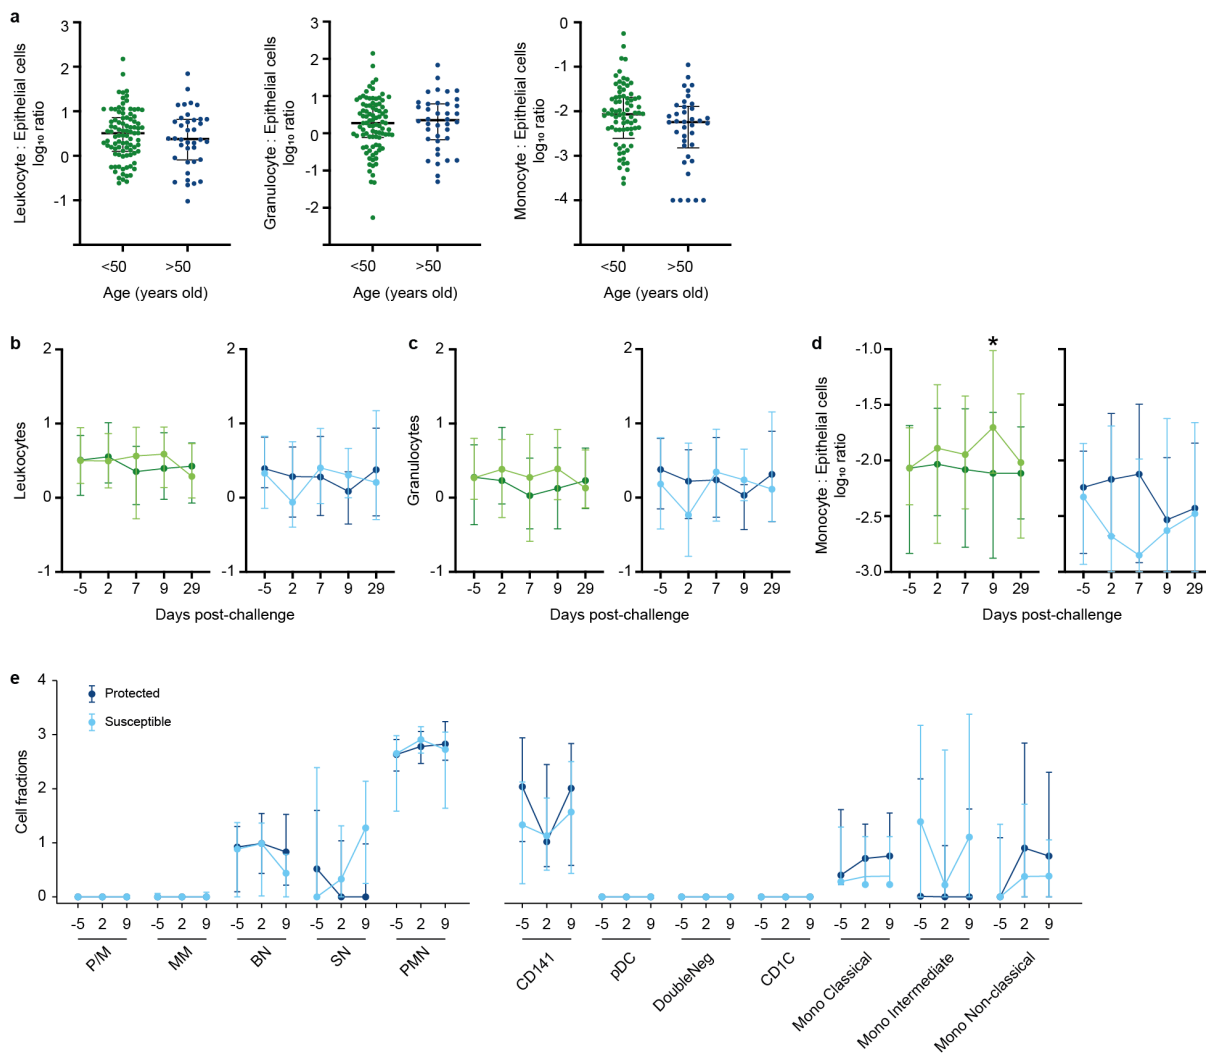

720

721 **Fig. 4. Recruitment of monocytes into the nasal mucosa of susceptible older adults is**  
 722 **impaired. a**, In nasal micro-biopsies, the number of leukocytes, granulocytes and monocytes  
 723 was comparable between younger (green, n=91) and older adults (blue, n=38) before  
 724 pneumococcal challenge (day -5). Cell numbers of each leukocyte subset were normalised to  
 725 epithelial cells as a ratio to account for differences in the total number of cells obtained for  
 726 each biopsy. **b-d**, Line graphs showing median and interquartile range of leukocytes, (b),  
 727 granulocytes (c), and monocytes (d) in younger and older study participants before (day -5)  
 728 and after (day 2, day 7, day 9 and day 29) pneumococcal challenge in susceptible (young:  
 729 light green n= 28; old: light blue line, n=22) and protected (young: dark green, n=39; old:  
 730 dark blue line, n=35) study participants. The proportion of monocytes increased at day 9 after  
 731 challenge in susceptible compared to protected younger adults (Mann Whitney U test, \*  
 732 p=0.0122). This recruitment of monocytes into the nasal mucosa was not observed in  
 733 susceptible older adults (n=15). **e**, Deconvolution analysis of granulocytes and myeloid cells  
 734 using CIBERSORTx. Using normalised gene expression (log<sub>2</sub> CPM (Counts Per Million)) and  
 735 granulocytes and monocytes databases to determine the estimated cell population proportion.  
 736 P/M (promyelocytes/myelocytes); MM (metamyelocytes); BN (band neutrophils); SN  
 737 (segmented neutrophils) and PMN (polymorphonuclear). CD141 (CD141+ dendritic cells),  
 738 pDC (plasmacytoid dendritic cells), double negative (CD1c-CD141- dendritic cells), CD1C  
 739 (CD1c+ dendritic cells), mono (monocytes).

740

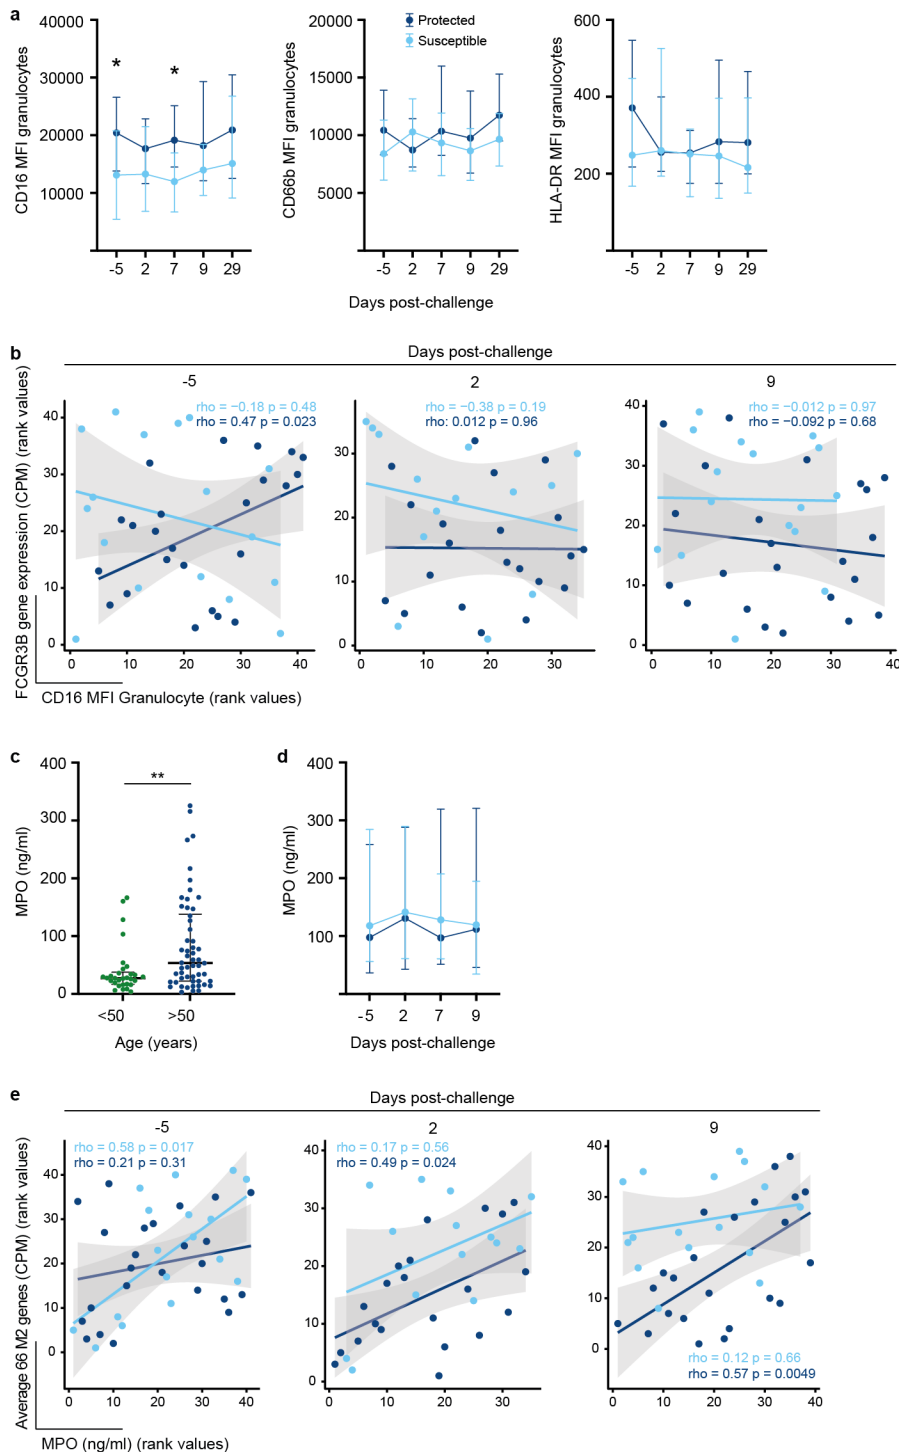

741

742

743 **Fig. 5. Granulocytes are activated in older adults susceptible to pneumococcal**  
 744 **colonisation** **a**, Line graph (median and interquartile range) of expression levels of CD16,  
 745 CD66b and HLA-DR on granulocytes before (day -5) and after challenge (day 2, day 7, day 9  
 746 and day 29) in protected (dark blue, n=34) and susceptible (light blue, n=22) older adults. The  
 747 expression level of CD16 was significantly lower on nasal granulocytes at baseline and day 7  
 748 (Mann Whitney U test, baseline: p=0.034, day 7: p=0.014). **b**, Correlation between expression  
 749 levels of FCGR3B gene and CD16 Granulocyte levels in nasal lining fluid at baseline (day -5),  
 750 day 2 and day 9 in protected and susceptible study participants. **c**, At baseline (day -5), the  
 751 concentration of MPO (Myeloperoxidase) in nasal lining fluid in older adults (n=54) was higher

752 than in younger adults (n=30). Shown are dot plots with median and interquartile range, Mann  
753 Whitney U test \*\* p=0.0085. **d**, The concentration of MPO did not change before or after  
754 pneumococcal challenge in older study participants who became susceptible (light blue, n=22)  
755 or remained protected (dark blue, n=33). Line graph showing median and interquartile range  
756 of MPO concentration before and after inoculation with pneumococcus. **e**, Correlation between  
757 expression levels of 66 M2 module genes associated with the Reactome pathway “neutrophil  
758 degranulation” and MPO concentration in nasal lining fluid at baseline (day -5), day 2 and day  
759 9 in protected and susceptible study participants.

760

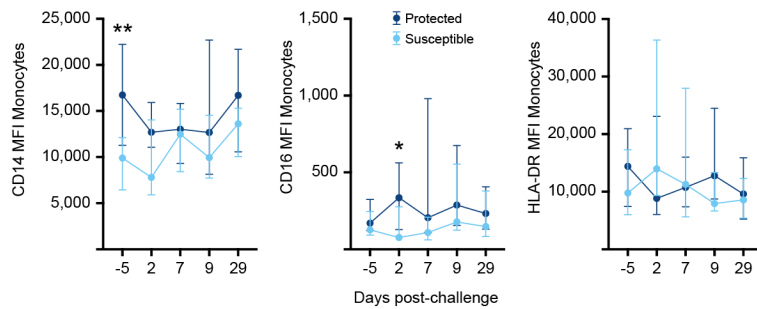

761

762 **Fig. 6. Monocytes are not recruited into the nasal mucosa after pneumococcal**  
763 **challenge. a,** Line graph (median and interquartile range) of expression levels of CD14, CD16,  
764 and HLA-DR on monocytes before (day -5) and after challenge (day 2, day 7, day 9 and day  
765 29) in protected (dark blue, n=25) and susceptible (light blue, n=14) older adults. The  
766 expression level of CD14 was significantly lower on nasal monocytes at baseline (Mann  
767 Whitney U test, baseline: p=0.0019).

768

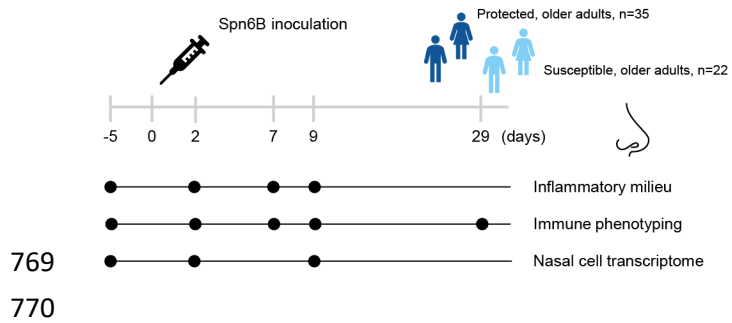

769  
770  
771 **Fig. S1: Study design.** Study design showing inoculation of study participants with  
772 Spn6B at day 0 and sample collection before (day -5) and after inoculation with Spn6B  
773 (day 2, day 7, day 9, and day 29). Samples collected were nasal lining fluid  
774 (nasosorption samples) for determination of the nasal inflammatory milieu and nasal  
775 cells (nasal curettage) for immune phenotyping and analysis of the nasal  
776 transcriptome. Study participants who remained protected (n=35) are depicted in dark  
777

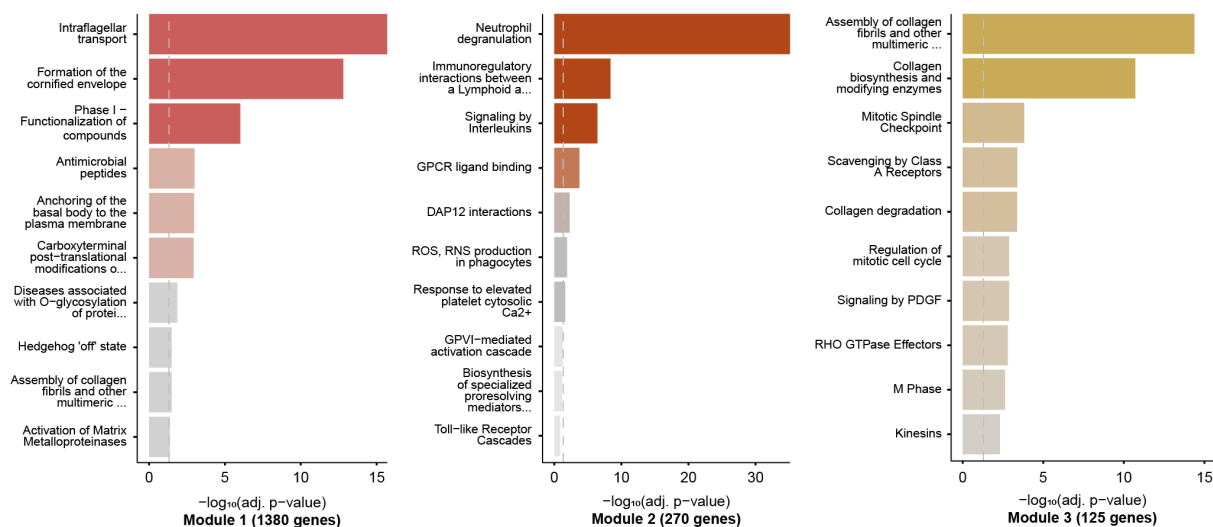

778

779

780 **Fig. S2. Modules of co-expressed gene sets functional analysis.** Over-Representation  
 781 Analysis (ORA) was used to determine biological pathways (using Reactome level 3 gene  
 782 sets) of co-expressed genes across all modules identified by CEMiTool.

783



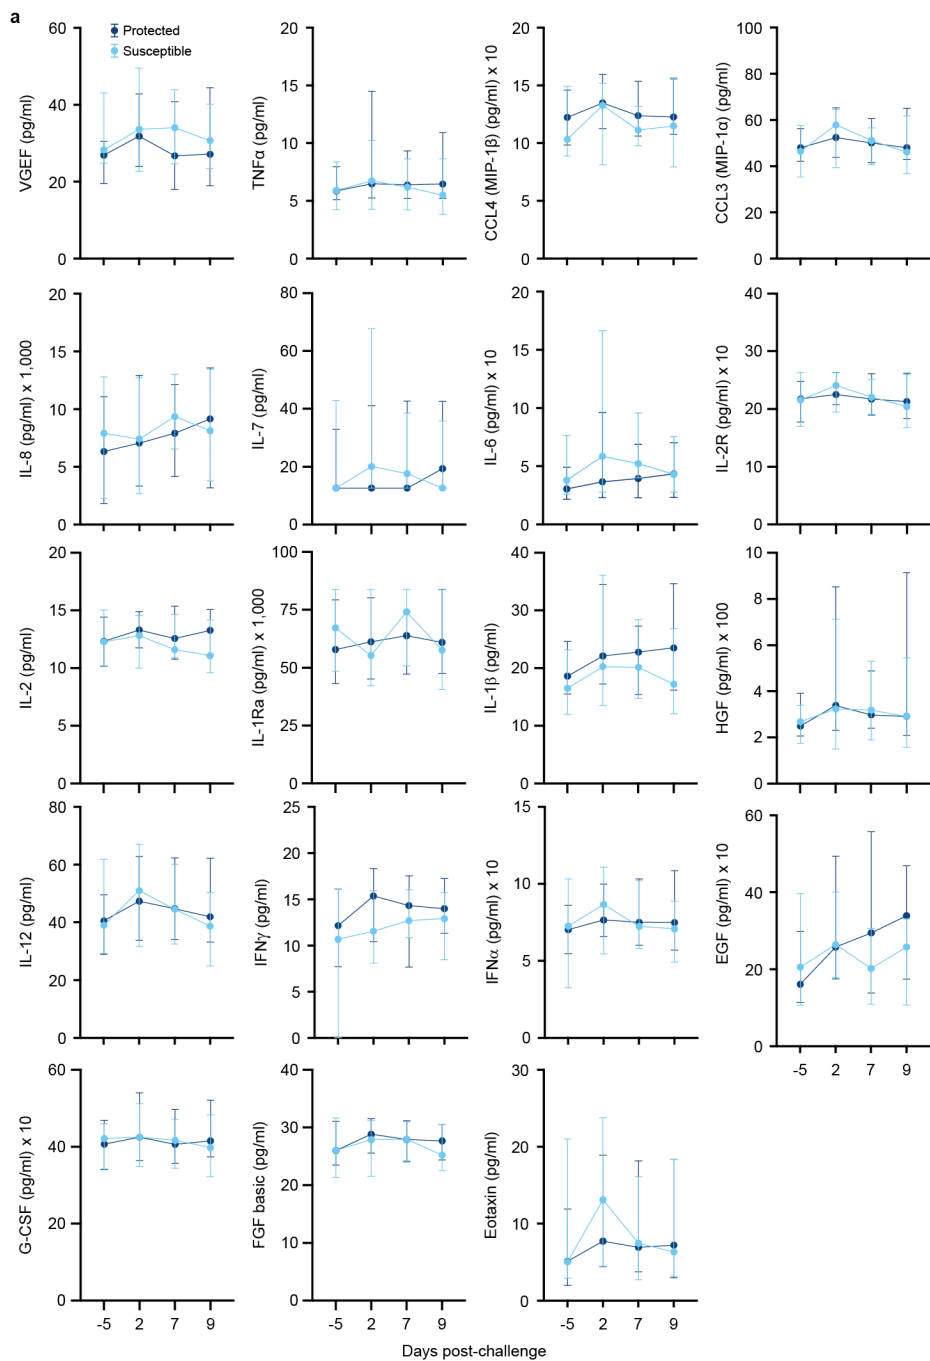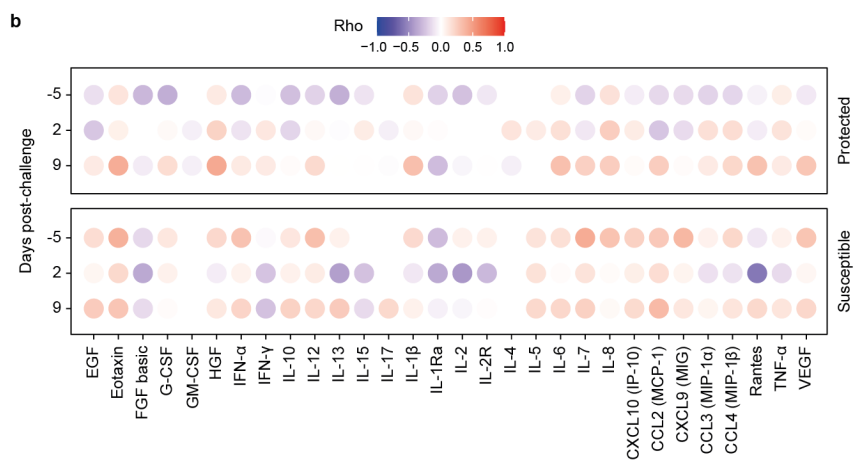

785 **Fig. S3. Cytokine concentration in the nasal lining fluid of older adults experimentally**  
786 **challenged with *S. pneumoniae* 6B.** **a**, Line graphs showing the median and interquartile  
787 range of cytokine concentrations in the nasal lining fluid in older study participants before (day  
788 -5) and after (day 2, day 7 and day 9) pneumococcal challenge in susceptible (light blue line,  
789 n=22) and protected (dark blue line, n=35) study participants. **b**, Correlation plot of association  
790 between age of protected and susceptible study participants with cytokine concentration  
791 before (day -5) and after (day2 and day9) pneumococcal challenge. Correlation was tested  
792 using Spearman rho with Benjamin Hochberg adjustment for multiple comparison.

793

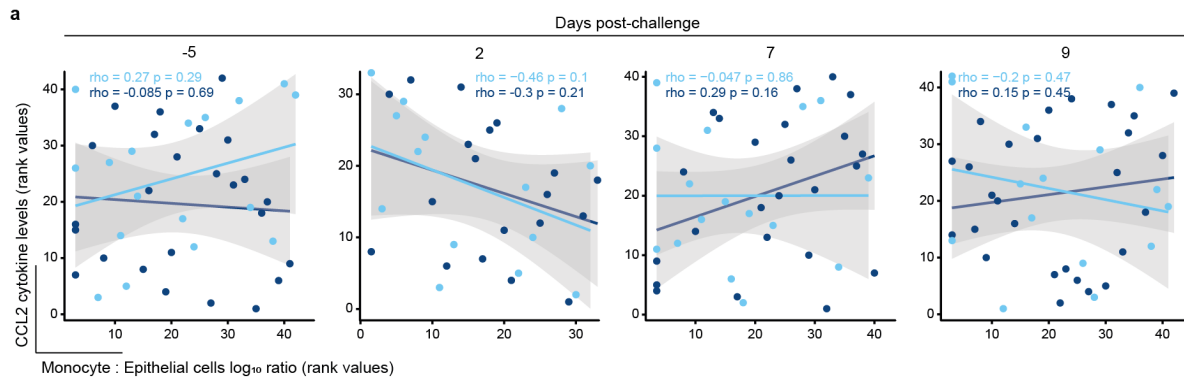

794

795

796 **Fig. S4. Monocytes are not correlated with CCL2 levels into the nasal mucosa before**  
797 **and after pneumococcal challenge.** Scatter plot of the CCL2 level (pg/ml) and monocyte:  
798 epithelial cells ratio before (day -5) and after challenge (day 2, day 7, and day 9), which  
799 showed no correlation in susceptible (light blue dots) and protected (dark blue dots) study  
800 participants.

801

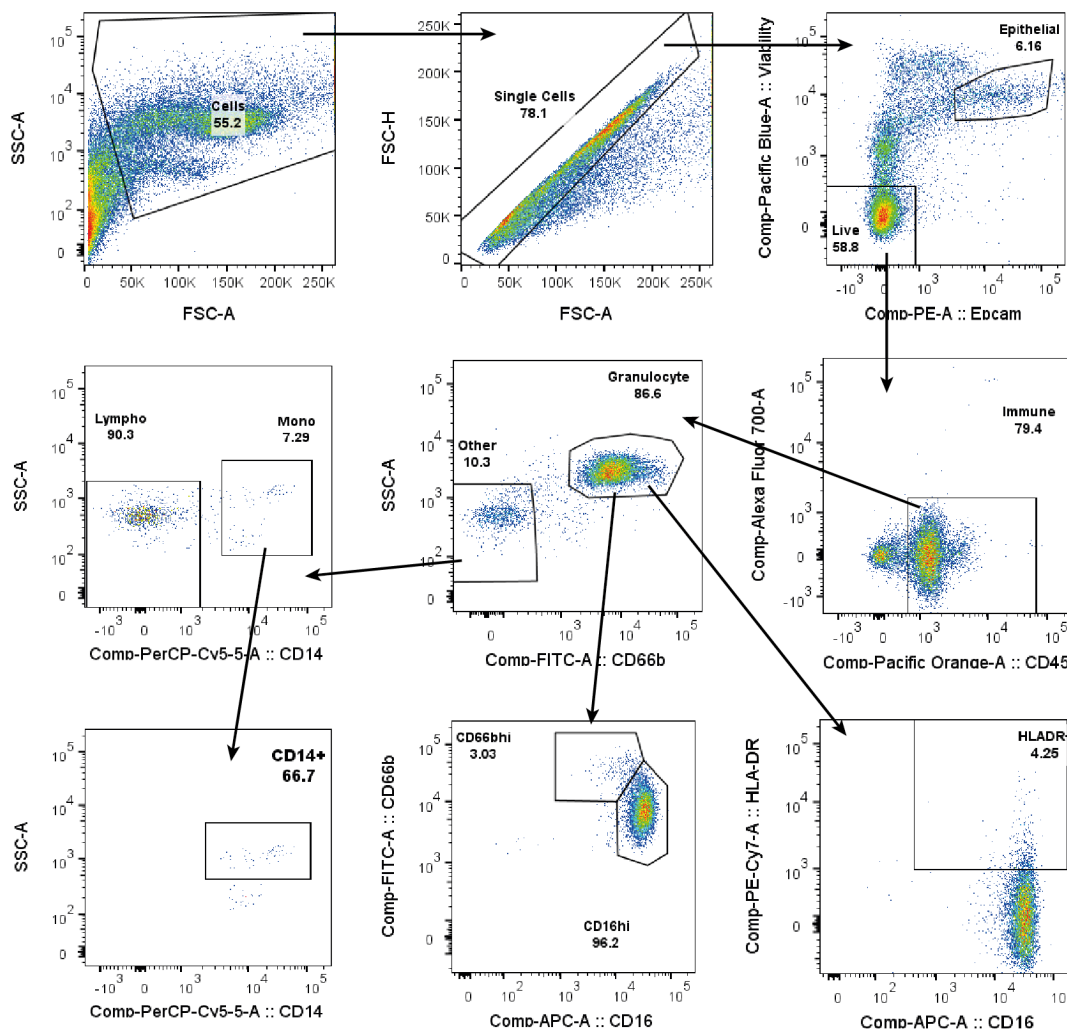

802

803

804 **Fig. S5. Gating strategy for nasal cells of one representative study participant.**

805

### Susceptible before exposure

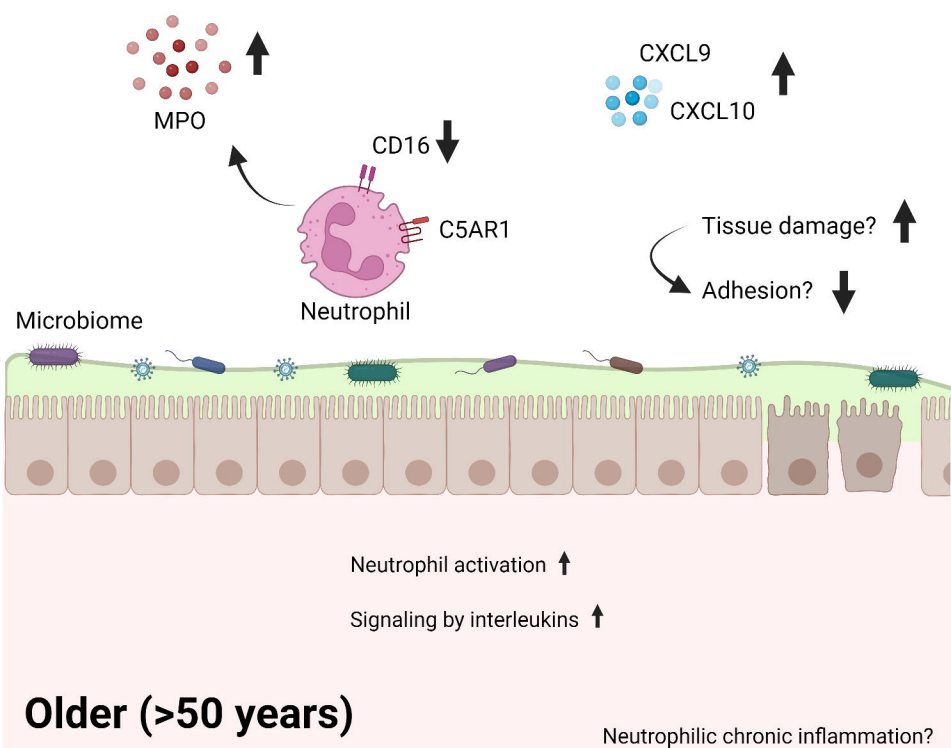

### Protected response to exposure

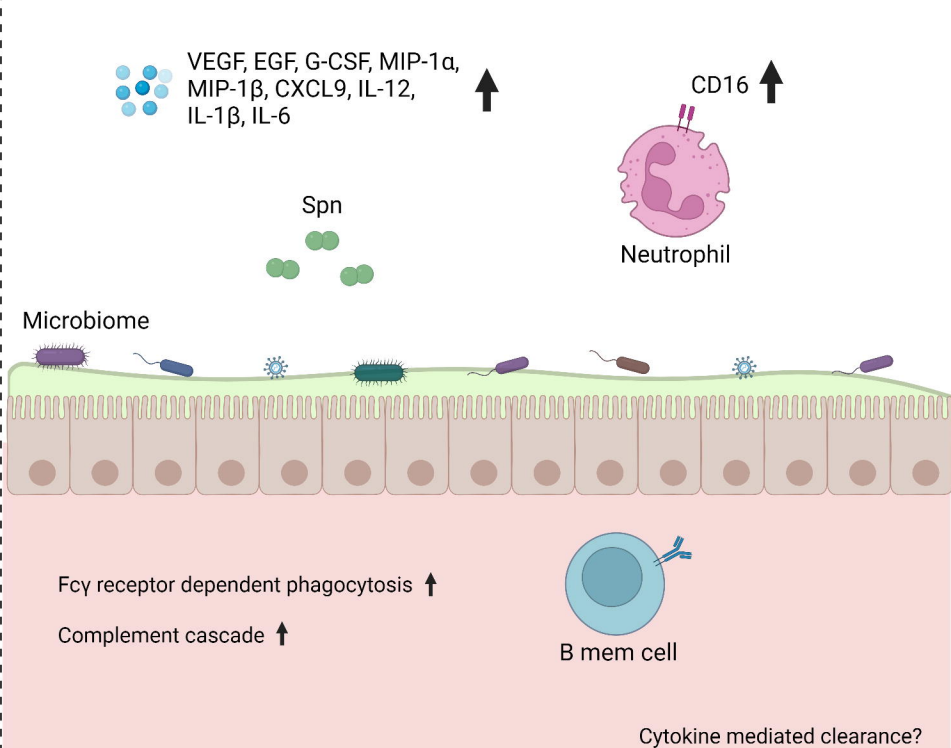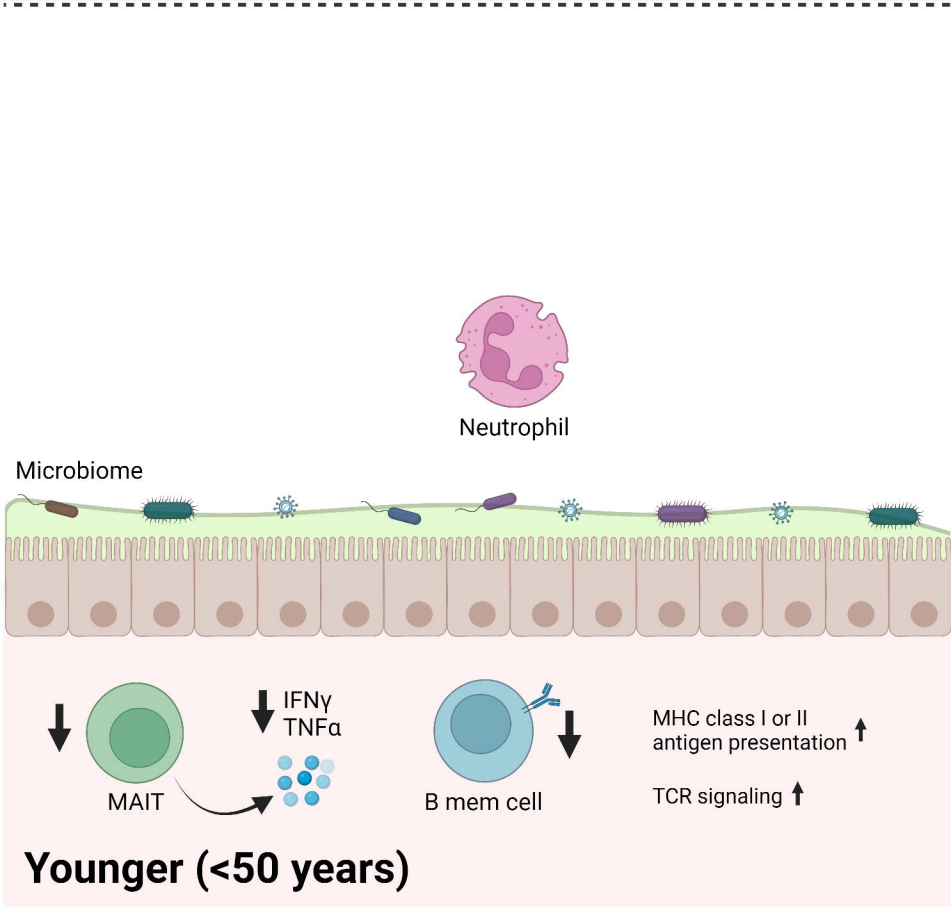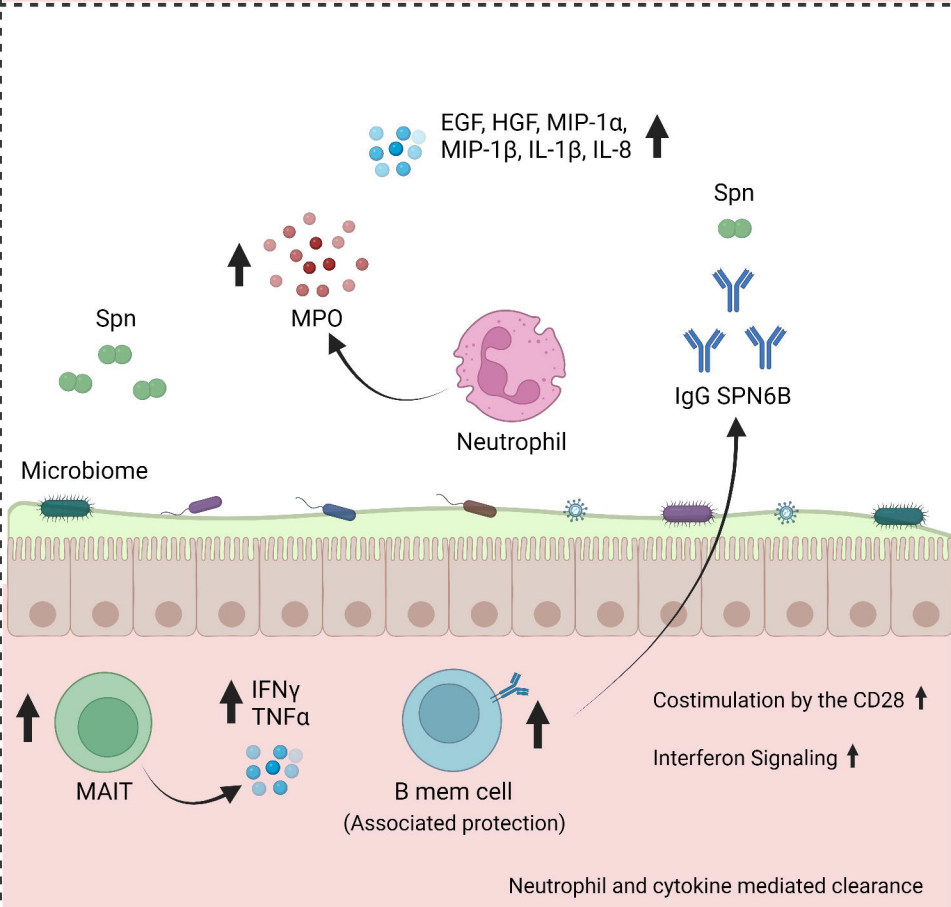

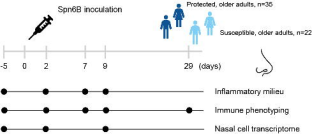

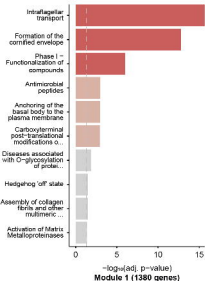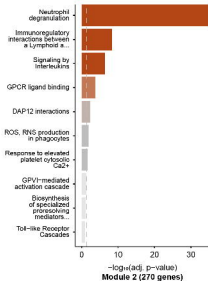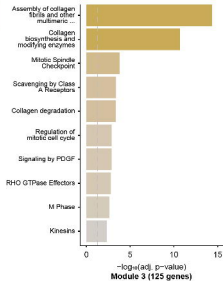

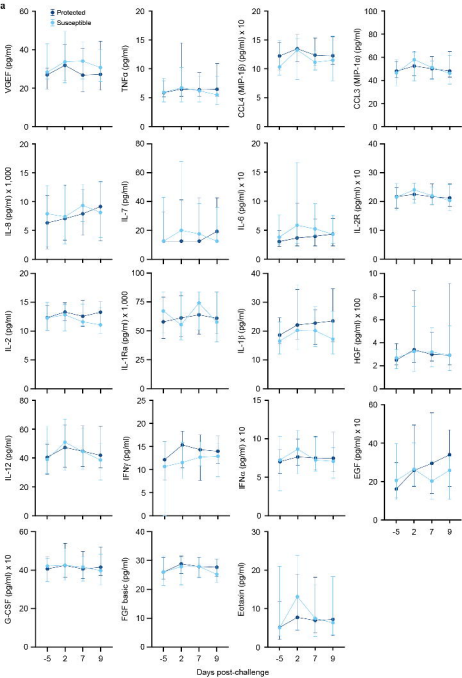

**b**

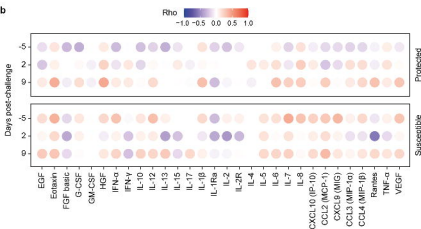



B

Days post-challenge

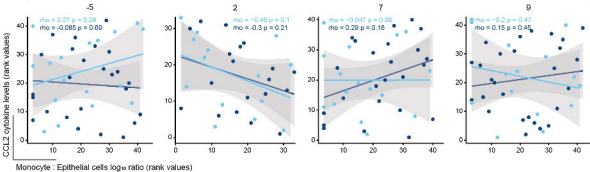

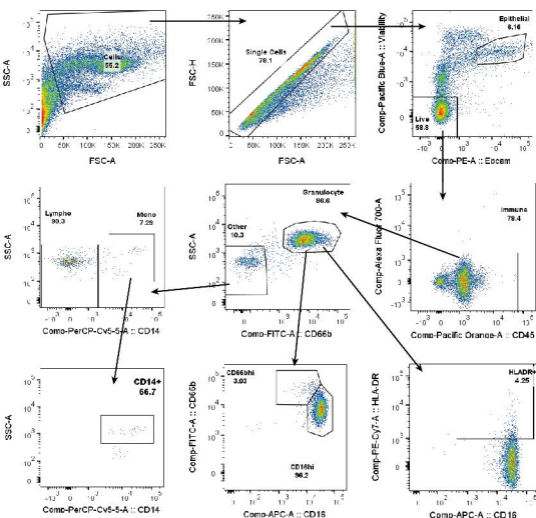

Source: http://medrxiv.org/content/10.1101/2023.11.16.23298619v1.full.pdf
